# Supplementary material
Source: PubMed Central journal article supplement (PMC5004956)
Supplement: JCI86522.sd.pdf [file JCI86522.sd.pdf]

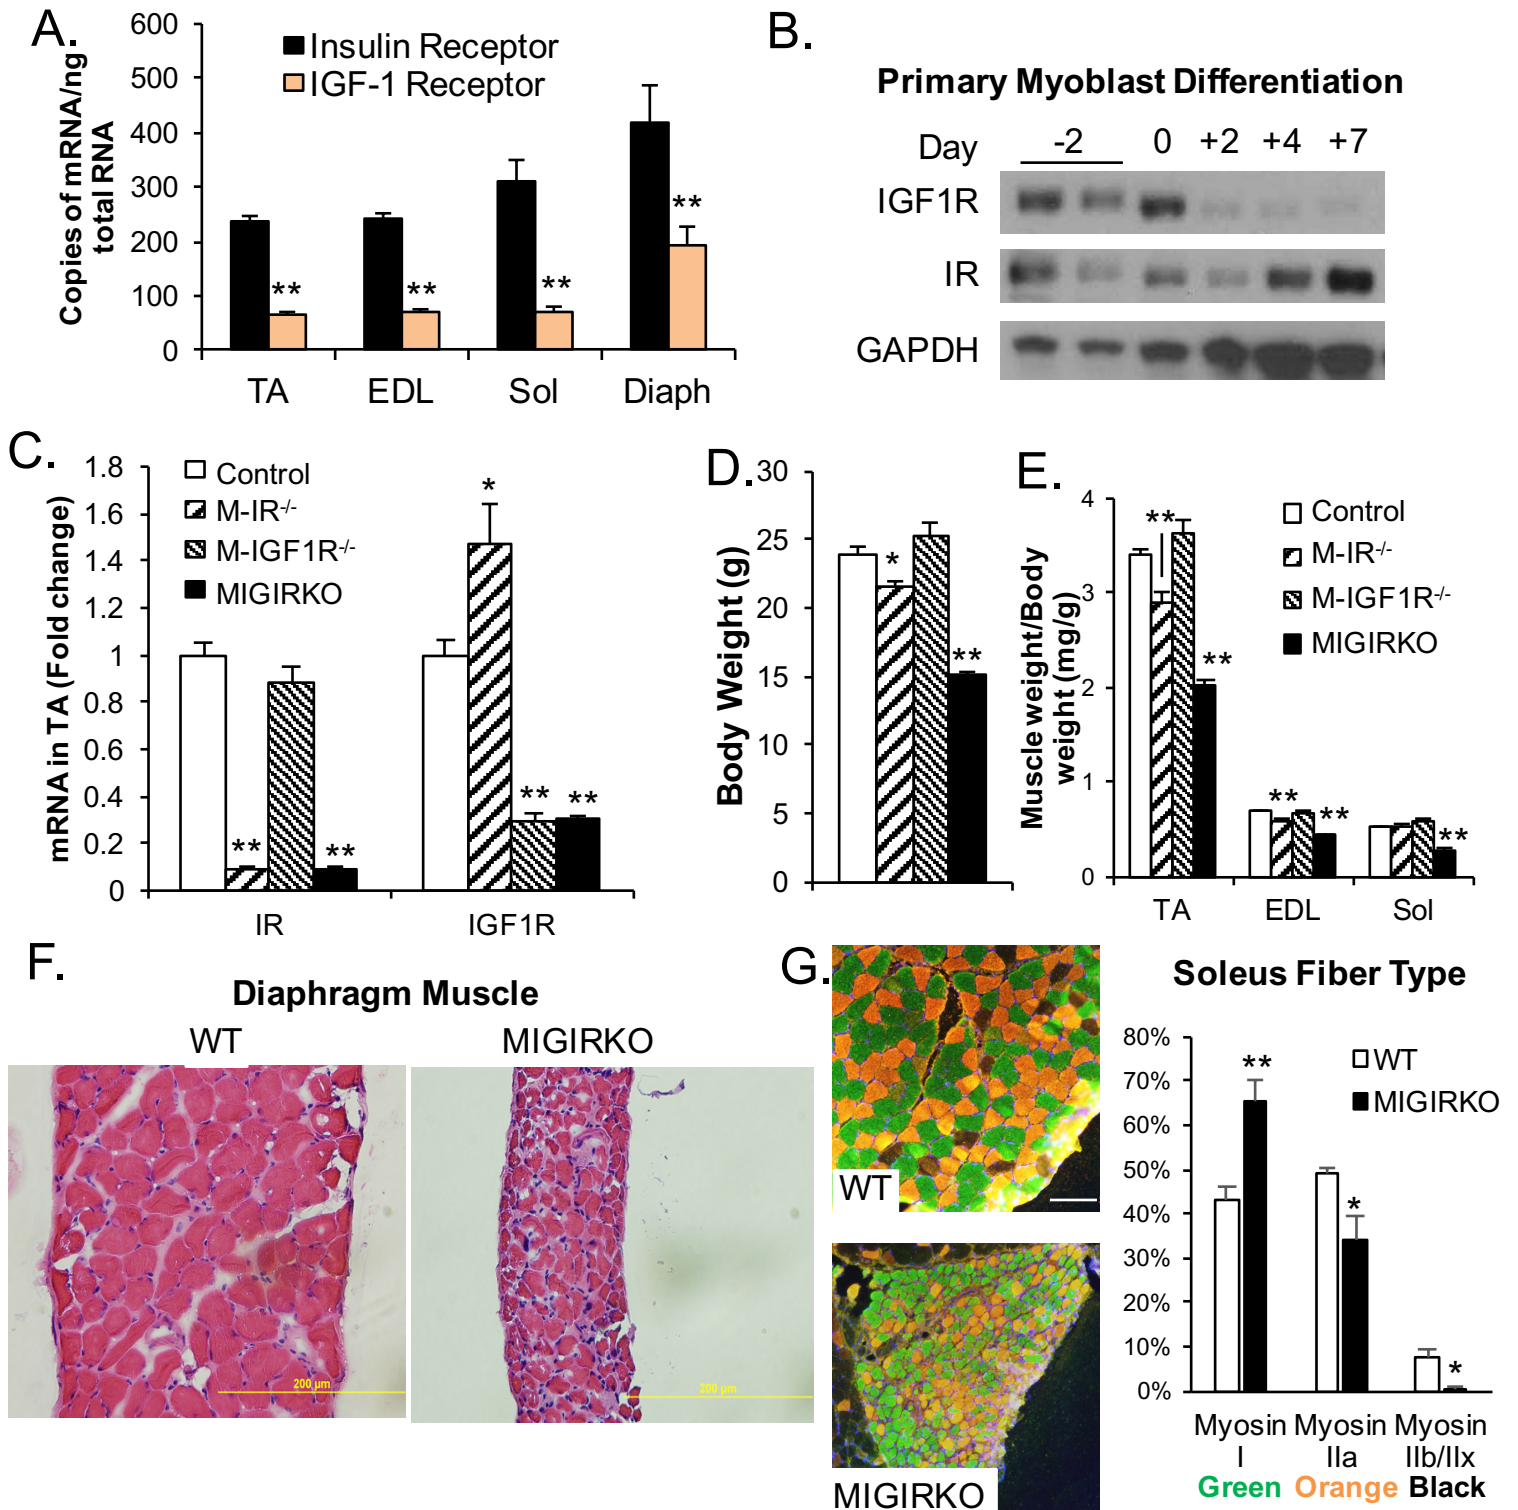

**Figure S1. IR is the predominant receptor in differentiated muscle and Deletion of IR and IGF1R in muscle dramatically decreases muscle size and Function.** (A) Copy number of insulin receptor and IGF-1 receptor mRNA determined by qPCR in muscle from 8-week-old male mice ( $n=7$ ) was performed and quantitated using recombinant plasmid standard as in Figure 1A (\*\*- $p<0.01$  vs. insulin receptor, TA data is the same as presented in Figure 1A). (B) IR and IGF1R western blot in primary mouse myoblasts during differentiation. (C) QPCR of quadriceps from fasted control, M-IR<sup>-/-</sup>, M-IGF1R<sup>-/-</sup>, and MIGIRKO mice ( $n=16$  pooled controls and 4-8 knockouts). (D) Body weight and (E) muscle weights normalized to body weight from 7-8 week old control M-IR<sup>-/-</sup>, M-IGF1R<sup>-/-</sup>, and MIGIRKO. (F) H&E staining of diaphragm muscle from control and MIGIRKO mice (bar = 200  $\mu$ m). (G) Fiber type density in soleus (bar = 100  $\mu$ m). (\*- $p<0.05$ ,\*\*- $p<0.01$  vs. control; Student's t-test for 2 groups, ANOVA for 4)

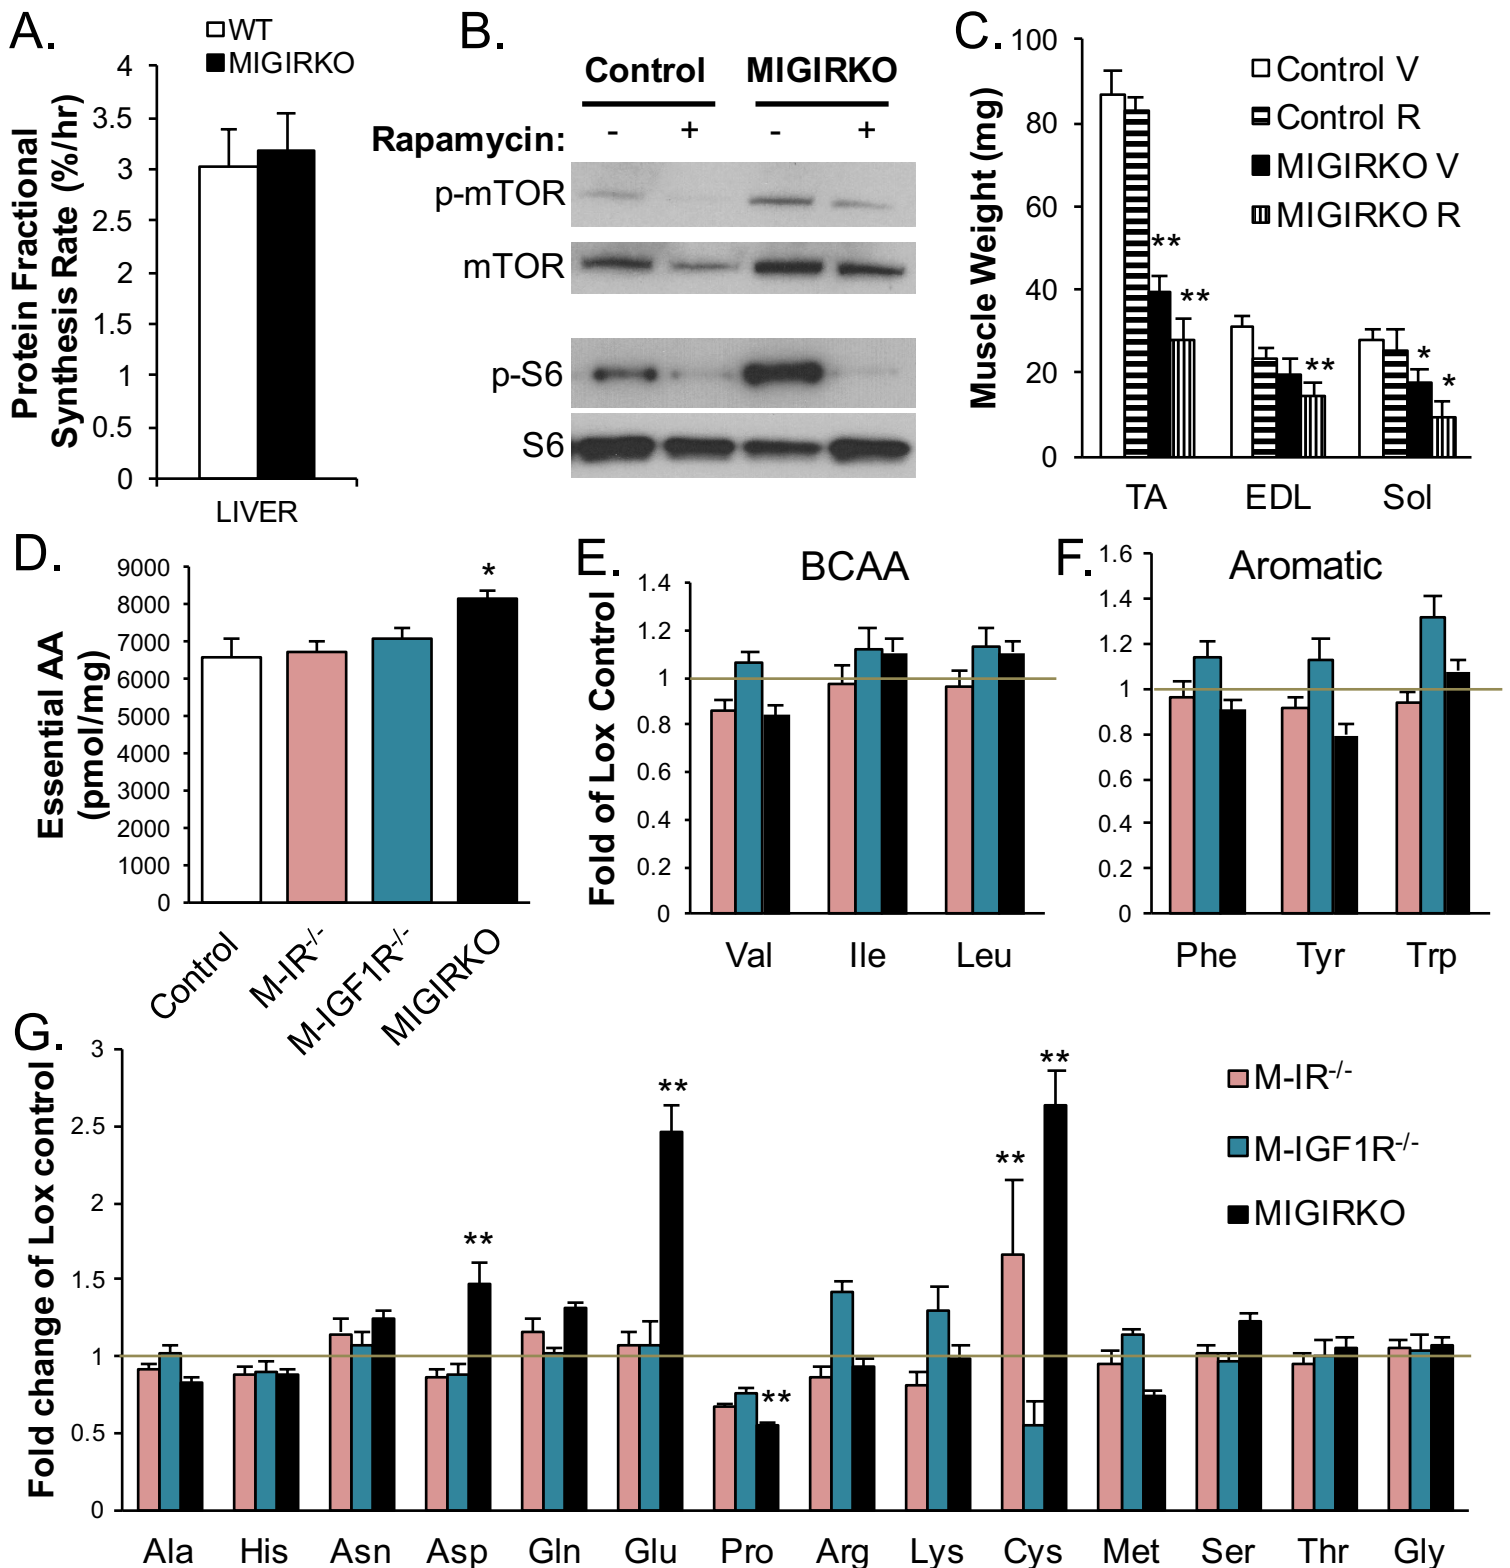

**Figure S2. Protein synthesis, mTOR signaling and Muscle Amino Acid levels are increased in MIGIRKO mice.** (A) Protein fractional synthesis rates were measured using <sup>13</sup>C-labeled phenylalanine in Liver (n=11). (B) Western blots for phosphorylation of mTOR and S6 in quadriceps from MIGIRKO and control mice treated with 1.2 mg/kg rapamycin for 12-14 days. (C) Muscle weight from MIGIRKO and control mice treated with rapamycin for 12-14 days (n=4-5 per group). (D) Essential amino acid (AA) levels measured by metabolomic analysis in hind limb muscle from M-IR<sup>-/-</sup>, M-IGF1R<sup>-/-</sup>, and MIGIRKO mice (n=18 pooled controls and 5-12 KO per group). Fold change of (E) Branch chain AA (BCAA), (F) Aromatic AA, and (G) other essential AA in knockout mice relative to control. (\*-p<0.05, \*\*-p<0.01 vs. control; ANOVA)

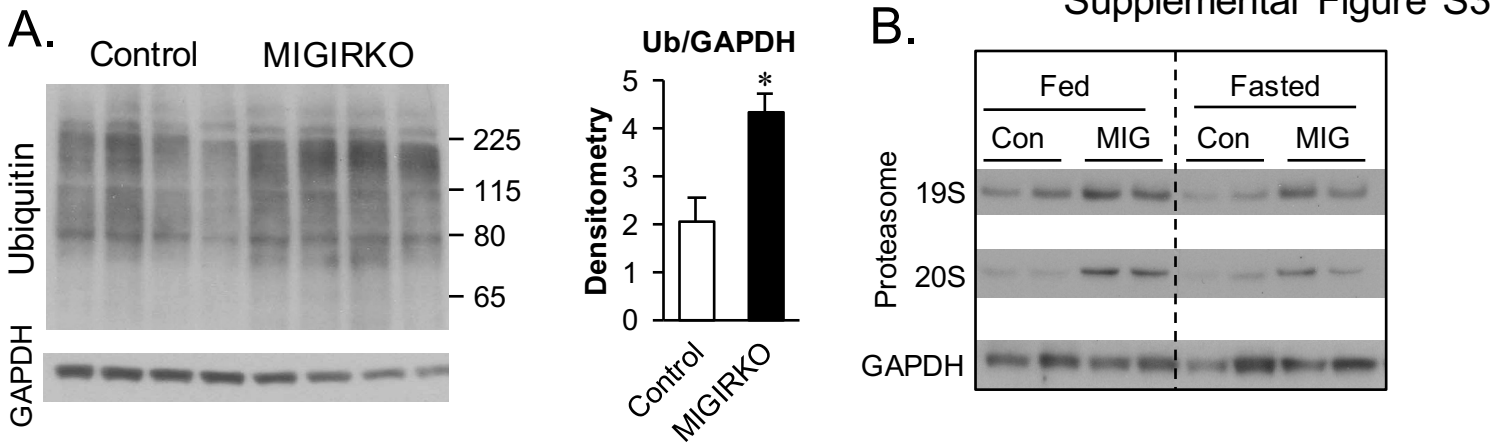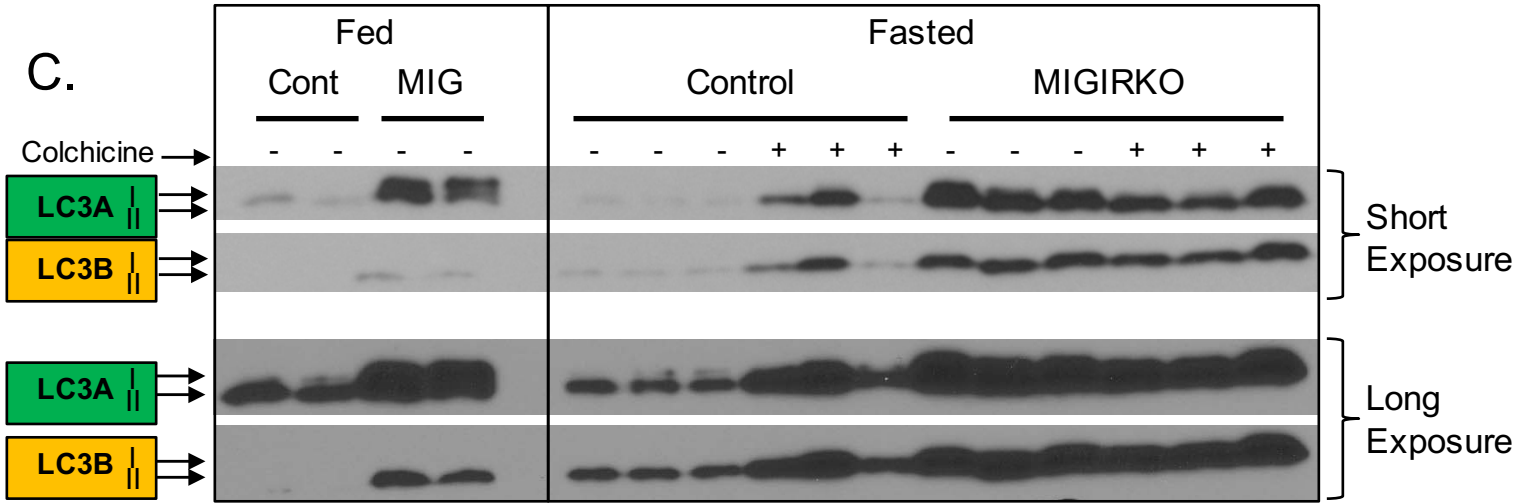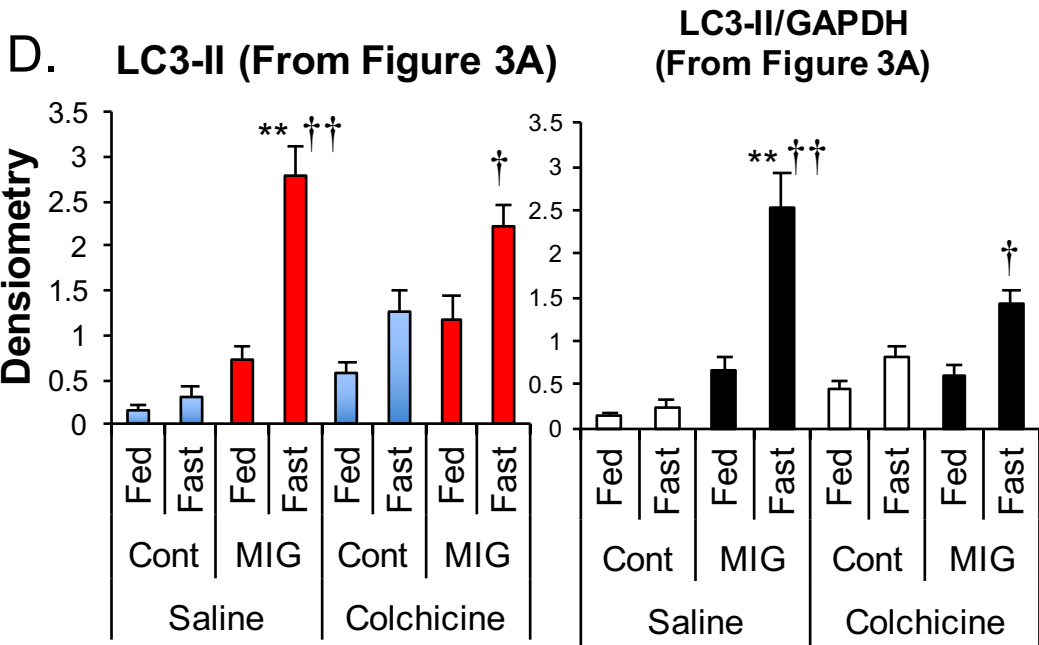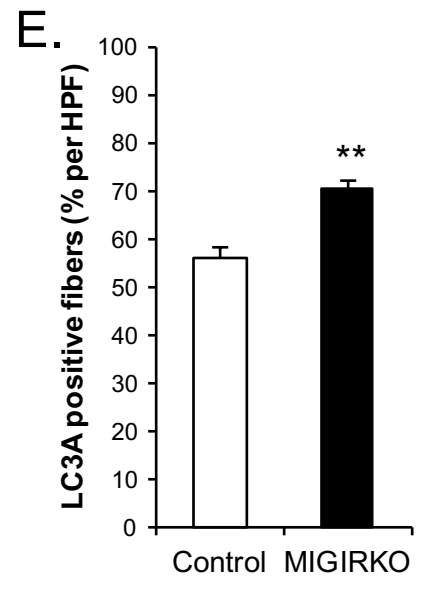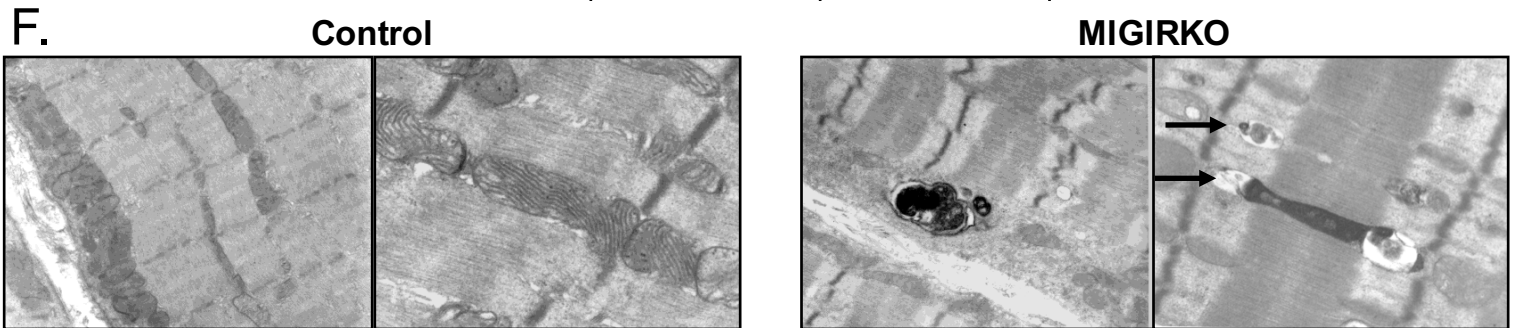

**Figure S3. Ubiquitin-Proteasome subunits, LC3 isoforms, and autophagosomes are increased in MIGIRKO muscle.** (A) Western blot and densitometry of total poly-ubiquitin (Ub) proteins in gastrocnemius from MIGIRKO and control mice treated with MG132 for 3 days. GAPDH normalizer blot is the same as depicted in Figure 2G as it was on the same gel. (B) Western blot of proteasomal subunits of the 19S regulatory complex (Rpt5/S6a) and the 20S core complex in quadriceps from MIGIRKO and control mice either fed or fasted overnight. (C) Western blots for LC3 using isoform-specific antibodies (LC3A – Cell Signaling #4599; LC3B – Cell Signaling #2775) in quadriceps muscle from fed or overnight-fasted MIGIRKO and control mice treated with either saline or 0.4 mg/kg colchicine for 2 days. (D) Densitometric analysis of LC3-II and LC3-I normalized to GAPDH from Figure 3 panel A using LC3A/B antibody (Cell Signaling #12741) (n=3-6 per group). (E) (F) Representative electron micrographs from soleus muscle of fed MIGIRKO and control mice showing double-membraned autophagosomes. (\*p<0.05, \*\*p<0.01 control vs. MIGIRKO; †p<0.05, ††p<0.01 fed vs. fasted, t-test for 2 groups, ANOVA for more)

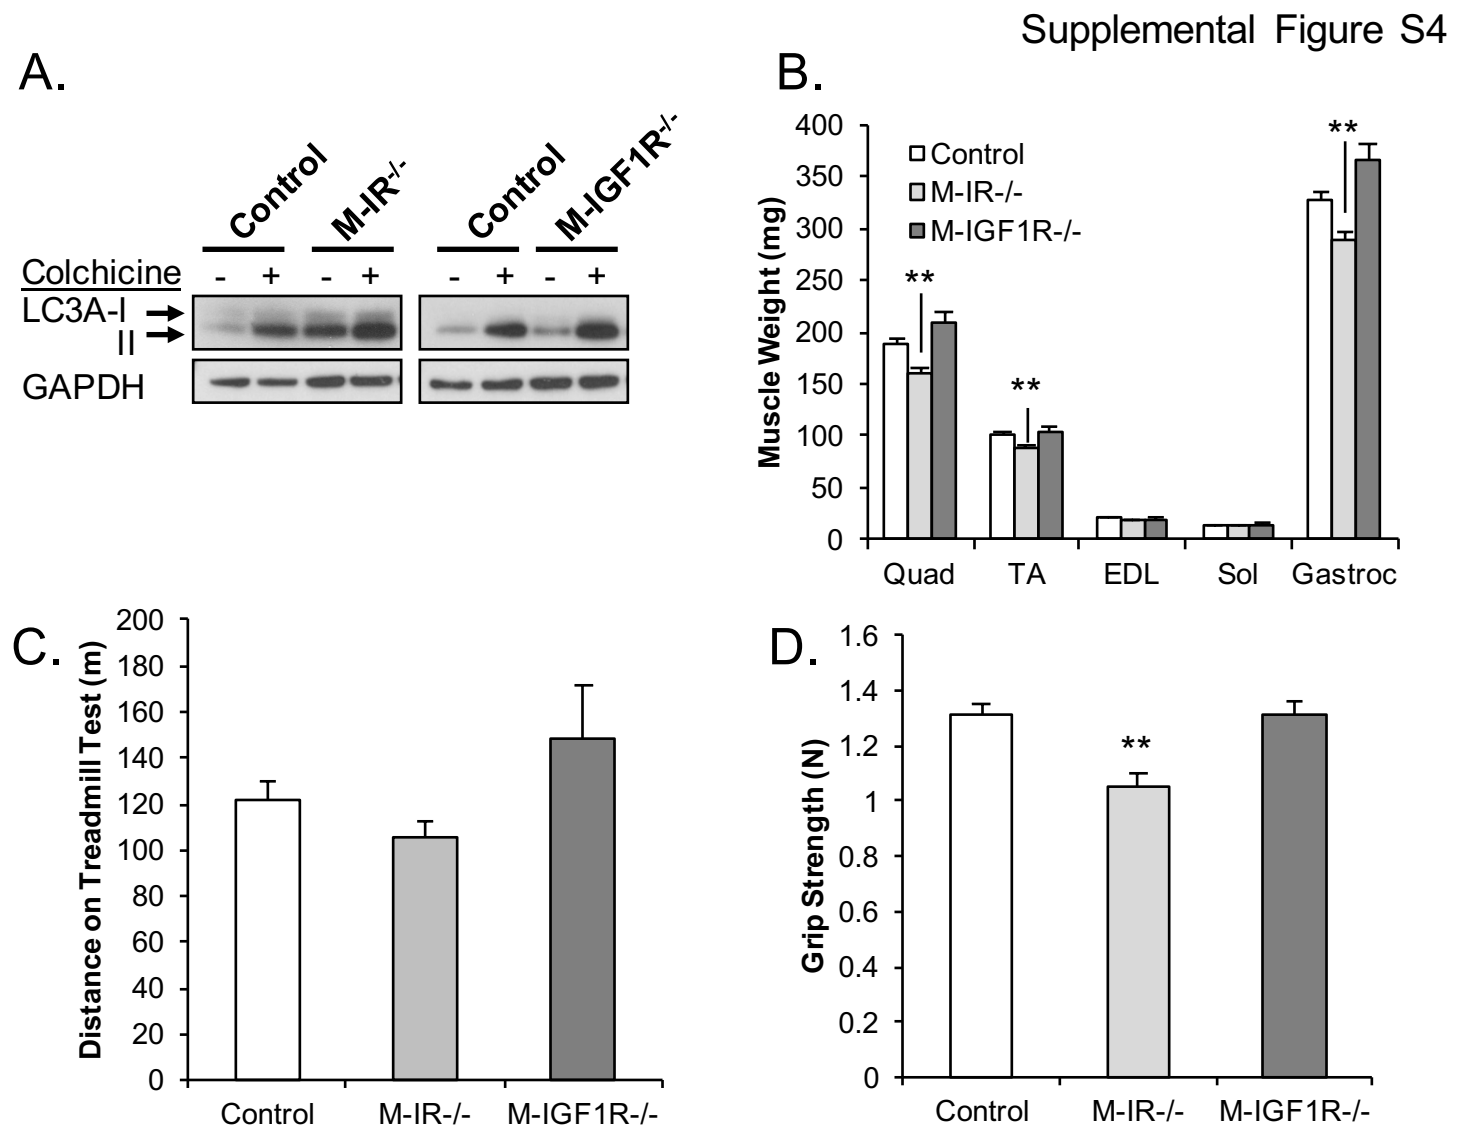

**Figure S4. M-IR<sup>-/-</sup> mice display muscle atrophy, muscle dysfunction and impaired autophagy as they age.** (A) Western blot of LC3A in quadriceps from 52-week old M-IR<sup>-/-</sup>, M-IGF1R<sup>-/-</sup>, and control mice treated for 2 days with colchicine or saline. (B) Muscle weights from 52-week-old M-IR<sup>-/-</sup>, M-IGF1R<sup>-/-</sup>, and control mice. (C) Distance run on acute treadmill test and (D) grip strength from 52-week old M-IR<sup>-/-</sup>, M-IGF1R<sup>-/-</sup>, and control mice. (\*\*p<0.01 vs. control, student's t-test)

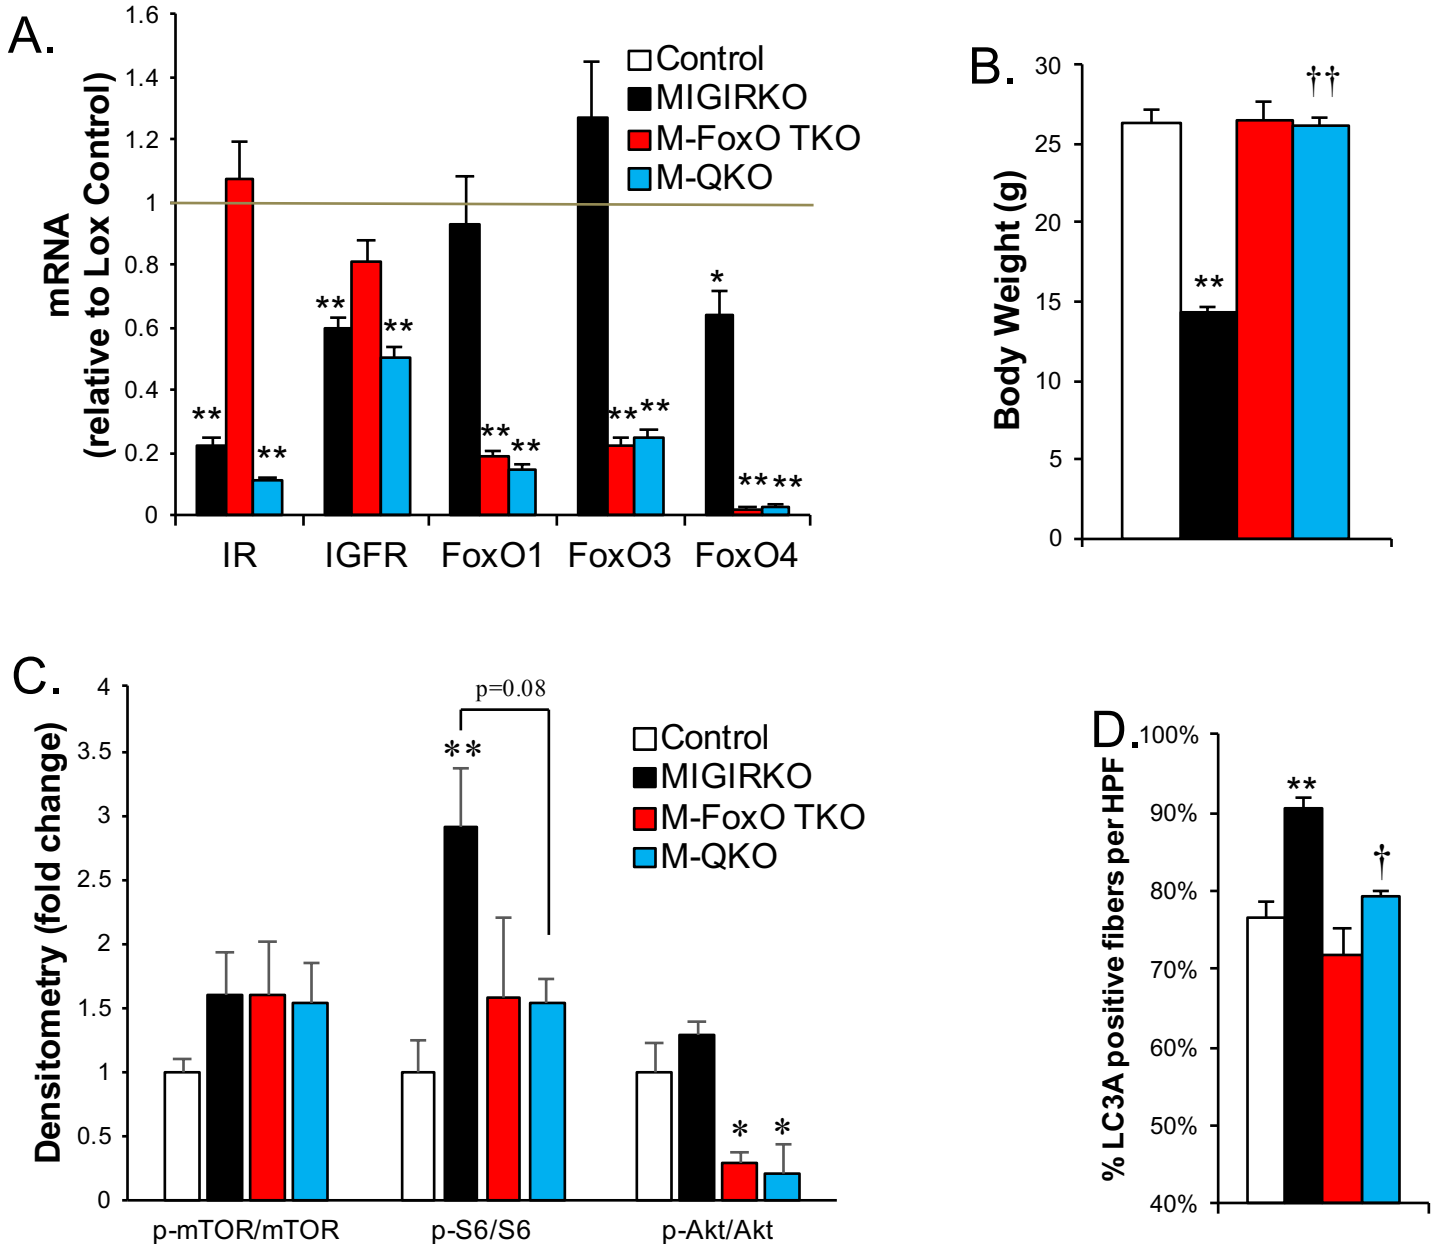

**Figure S5. Deletion of FoxO1/3/4 in MIGIRKO mice normalizes body weight, attenuates mTOR signaling and decreases Akt activation.** (A) mRNA levels of IR, IGF1R and FoxO isoforms in MIGIRKO, M-FoxO TKO, and M-QKO TA muscle relative to littermate lox controls. (B) Body weights of control and knockout mice (n=5-7 per group). (C) Densitometry of western blots from Figure 6B (n=5-6 per group). (D) Percent of LC3A-positive myofibers per high power field from Figure 6 panel C. (\*-p<0.05, \*\*-p<0.01 vs. Control, †-p<0.05, ††-p<0.01 MIGIRKO vs. M-QKO, ANOVA).

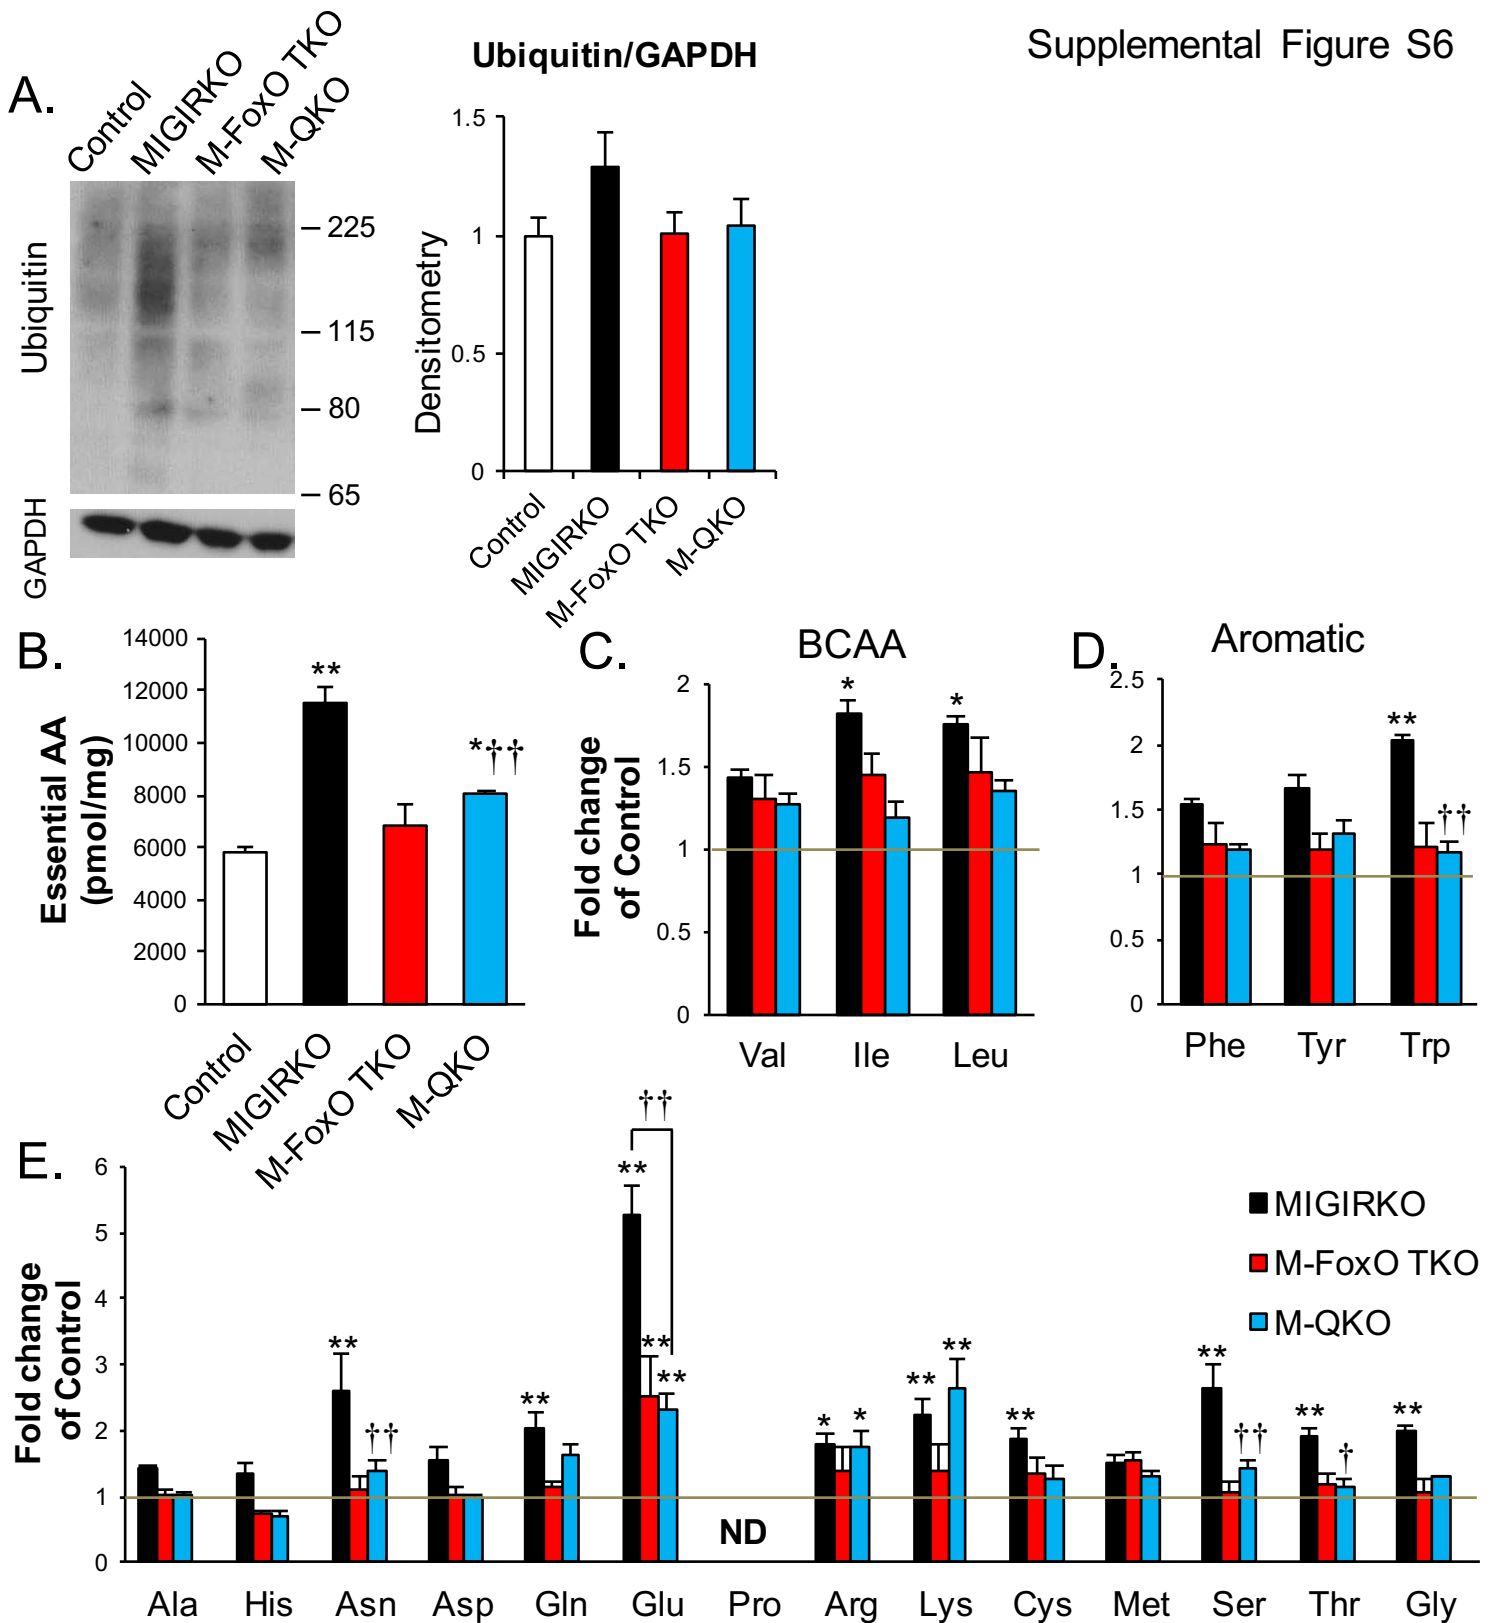

**Figure S6. Deletion of FoxO1/3/4 in MIGIRKO mice attenuates ubiquitination and Amino Acid differences.** (A) Western Blot and densitometry of total poly-ubiquitin proteins in Control, MIGIRKO, M-FoxO TKO, and M-QKO quadriceps (n=5-6 per group). (B) Essential amino acid (AA) levels in hind limb muscle from MIGIRKO, M-FoxO TKO, and M-QKO (n=6 per group). Fold change of (C) Branch chain AA (BCAA), (D) Aromatic AA, and (E) other essential AA in knockout mice relative to control. (\*-p<0.05, \*\*-p<0.01 vs. Control, ††-p<0.01 MIGIRKO vs. M-QKO, ANOVA). ND – not determined.

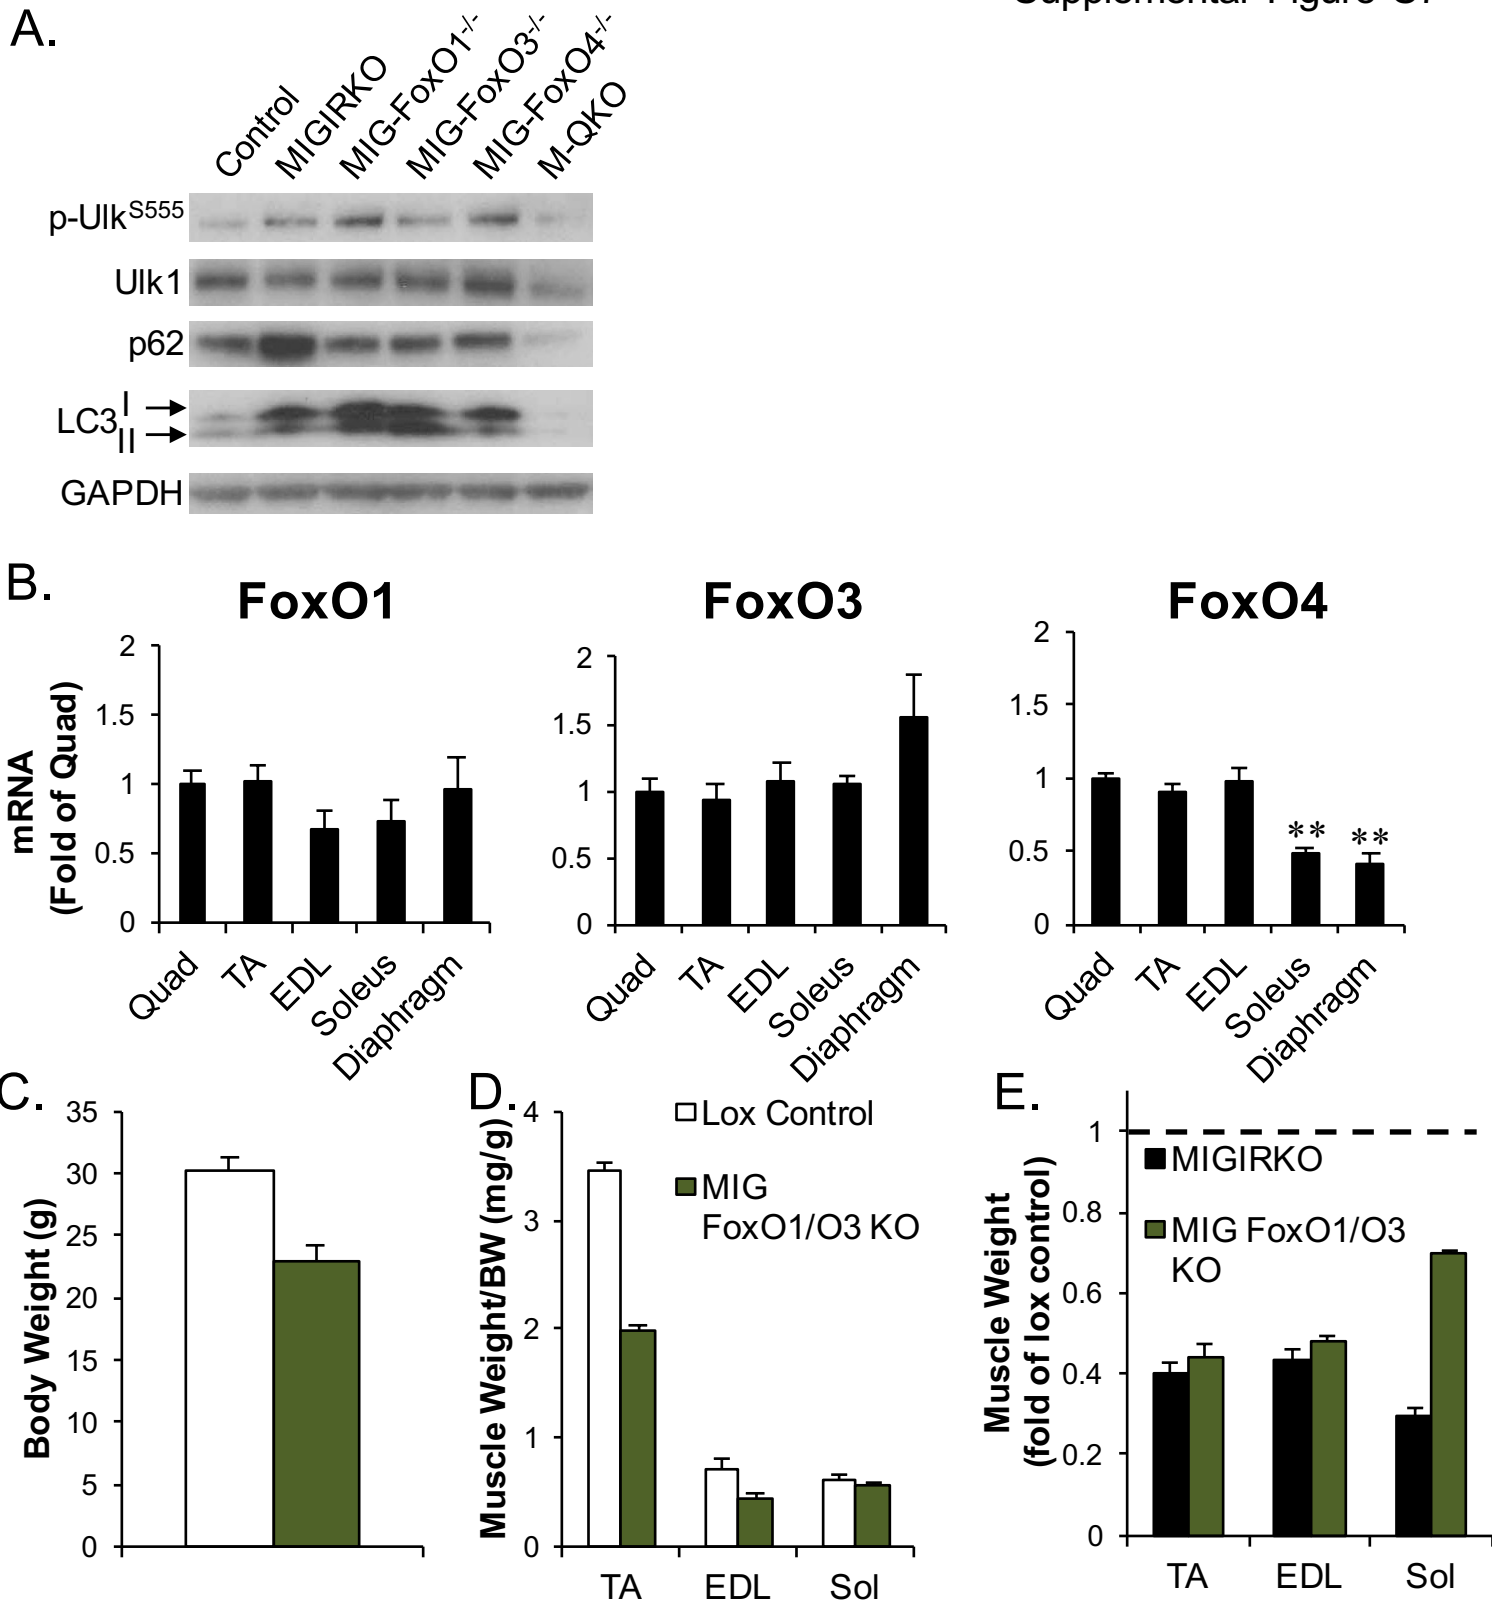

**Figure S7. Deletion of individual FoxOs does not reverse autophagy in MIGIRKO, while deletion of both FoxO1 and FoxO3 partially rescues oxidative muscle atrophy in MIGIRKO.** (A) Western Blot of autophagy markers in TA muscle from mice in Figure 7F-7G. GAPDH normalizer blot is the same as depicted in Figure 7F as it was on the same gel. (B) mRNA levels of FoxO isoforms in 5 different muscle groups from control mice (n=4-8). (C) Body weights and (D) muscle weight normalized to body weight of control and MIG-FoxO1/O3 KO mice at 8 weeks of age (n=2). (E) Percent decrease in muscle mass in MIGIRKO and MIG-FoxO1/O3 KO relative to littermate controls (n=2). (\*\*-p<0.01 vs. Quad, Student's t-test)

**Supplemental Table S1. Primers for QPCR of mouse genes.**

| Common name         | Gene name         | 5' primer                  | 3' primer                  |
|---------------------|-------------------|----------------------------|----------------------------|
| <b>mRNA Primers</b> |                   |                            |                            |
| IR                  | <i>Insr</i>       | AAATGCAGGAACTCTCGGAAGCCT   | ACCTTCGAGGATTTGGCAGACCTT   |
| IGF1R               | <i>Igf1r</i>      | ATCGCGATTTCTGCGCCAACA      | TTCTTCTCTTCATCGCCGAGACT    |
| IGF-1               | <i>Igf1</i>       | GACCGAGGGGCTTTTACTTC       | GGGGCACAGTACATCTCCA        |
| Myf5                | <i>Myf5</i>       | AATGCCATCCGCTACATTGAGAGC   | TGTCAAAGCTGCTGTTCTTTTCGGG  |
| MyoD                | <i>Myod1</i>      | AGCACTACAGTGGCGACTCAGAT    | TCCACTATGCTGGACAGGCAGT     |
| Myogenin            | <i>Myog</i>       | TTGCTCAGCTCCCTCAACCAGGA    | AGATTGTGGGCGTCTGTAGGGTCA   |
| Myostatin           | <i>Mstn</i>       | TGGCTCAAACAGCCTGAATCCAAC   | TGGGTGTGTCTGTCACCTTGACTT   |
| Follistatin         | <i>Fst</i>        | AGTGACTTACTCCAGCGCCT       | TTACTGTCAGGACACAGCTCATCG   |
| Actin (SkM)         | <i>Acta1</i>      | TTCAACGTGCCTGCCATGTATGTG   | ATGATGGCGTGTGGCAGGGCATA    |
| Desmin              | <i>Des</i>        | ACCAGGACCTGCTCAATGTGAAGA   | TCGGAAGTTGAGAGCAGAGAAGGT   |
| MCK                 | <i>Ckm</i>        | GCAGCAGCTCATTGATGACCACTT   | ACCTCCTTCATATTGCCTCCCTTC   |
| Myosin I            | <i>Myh7</i>       | ACCAGGCCCTTTGACCTCAAGAAA   | TCTTGTGCGAACTTGGGTGGGTTCT  |
| Myosin IIa          | <i>Myh2</i>       | TCACATCCAACAAGAAGCCAGAGC   | CCCTGGCTGACAAATGGGTAATCA   |
| Myosin IIb          | <i>Myh4</i>       | AGTCCCAGGTCAACAAGCTG       | TTTCTCCTGTCACTCTCAACA      |
| Myosin IIx          | <i>Myh1</i>       | AGTCCCAGGTCAACAAGCTG       | CACATTTTGTCTCATCTCTTTG     |
| p27 Kip1            | <i>Cdkn1b</i>     | GGGGAACCGTCTGAAACATT       | AGTGTCCAGGGATGAGGAAG       |
| Gadd45a             | <i>Gadd45a</i>    | GGATCCTTCCATTGTGATGAA      | TGCTACTGGAGAACGACGC        |
| 4E-BP               | <i>Eif4ebp1</i>   | CCT CCT TGT GCC TGT GTC TA | GCC TAA GGA AAG ATG GGT GT |
| Cathepsin L         | <i>Ctsl</i>       | TATCCCTCAGCAAGAGAAAGCCCT   | TCCTTCATAGCCATAGCCCACCAA   |
| p62                 | <i>Sqstm1</i>     | TCTGGGGTAGTGGGTGTCAG       | AGAATGTGGGGGAGAGTGTG       |
| LC3A                | <i>Map1lc3a</i>   | TCTGGTCCCAGACCATGTTA       | GGTTGACCAGCAGGAAGAAG       |
| LC3B                | <i>Map1lc3b</i>   | CACTGCTCTGTCTTGTGTAGGTTG   | TCGTTGTGCCTTTATTAGTGCATC   |
| Lamp2a              | <i>Lamp2</i>      | ACAACCTGACTCCTGTCTGTTTCTG  | AGTTGGAGTTGGAGTGGGTGTTGA   |
| Gabarapl 1          | <i>Gabarapl 1</i> | GTCATCGTGGAGAAGGCTCCTAAA   | GGAGGGATGGTGTGTTGACAAAG    |
| Psm1                | <i>Psm1</i>       | CGTTCTCAATCAGCTCGTACTT     | CTGCAGGGAGTGTCTCTCTT       |
| Psm4                | <i>Psm4</i>       | TGTGGACATGCTTGGTGTAG       | CTGGCTGCTTCTCTAGAACTT      |
| Psmc4               | <i>Psmc4</i>      | CTTGGAAAGCTGTGGATCAGAA     | TCCCGGTCGATGGTACTC         |
| Psm11               | <i>Psm11</i>      | CTAGATATGGAAGCAGCCACAG     | CCAATGCTTGGCGTAAGAAAG      |
| Atrogin-1           | <i>Fbxo32</i>     | CTGTGCTGGTGGGCAACATTAACA   | CGTCACTCAGCCTCTGCATGAT     |
| MuRF-1              | <i>Trim63</i>     | ATGAAGTGATCATGGACCGGCA     | TTGCACAAGGAGCAAGTAGGCA     |
| MUSA1               | <i>Fbxo30</i>     | TCG TGG AAT GGT AAT CTT GC | CCT CCC GTT TCT CTA TCA CG |
| SMART               | <i>Fbxo21</i>     | TCA ATA ACC TCA AGG CGT TC | GTT TTG CAC ACA AGC TCC A  |
| UBC                 | <i>Ubc</i>        | CGTCGAGCCCAGTGTTACCACC     | ACCTCCCCATCACACCCAAGA      |
| FoxO1               | <i>Foxo1</i>      | TGCTGTGAAGGGACAGATTG       | GAGTGGATGGTGAAGAGCGT       |
| FoxO3               | <i>Foxo3</i>      | ACAAACGGCTCACTTTGTCCAGGA   | TCTTGCCCGTGCCTTCTATTCT     |
| FoxO4               | <i>Foxo4</i>      | GGTGCCCTACTTCAAGGACA       | AGCTTGCTGCTGCTATCCAT       |
| TBP                 | <i>Tbp</i>        | ACCCTTCACCAATGACTCCTATG    | TGACTGCAGCAAATCGCTTGG      |
| GAPDH               | <i>Gapdh</i>      | TGTCGTGGAGTCTACTGGTGTCTT   | TCTCGTGGTTCACACCCATCACAA   |



**Supplemental Table S2. Antibodies used.**

| <b>Protein</b>                                          | <b>Vendor</b>           | <b>Catalog number</b> | <b>Dilution</b> |
|---------------------------------------------------------|-------------------------|-----------------------|-----------------|
| <b>Immunofluorescence Antibodies</b>                    |                         |                       |                 |
| LC3A                                                    | Cell Signaling          | 4599                  | 1:200           |
| Laminin                                                 | Sigma                   | L9393                 | 1:200           |
| Myosin IIa                                              | DSHB University of Iowa | SC-71                 | 1:200           |
| Myosin heavy chain, slow                                | DSHB University of Iowa | BA-F8                 | 1:200           |
| Alexa-Fluor-594 Goat anti mouse                         | Life Technologies       | #A-11032              | 1:500           |
| Alexa-Fluor-488 Goat anti rabbit                        | Life Technologies       | #A-11008              | 1:500           |
| <b>Western Blot Antibodies</b>                          |                         |                       |                 |
| p-mTOR S2448                                            | Cell Signaling          | 5536                  | 1:1000          |
| mTOR                                                    | Cell Signaling          | 2983                  | 1:1000          |
| p-S6K T389                                              | Cell Signaling          | 9205                  | 1:1000          |
| S6K                                                     | Cell Signaling          | 9202                  | 1:1000          |
| p-S6                                                    | Cell Signaling          | 2211                  | 1:1000          |
| S6                                                      | Cell Signaling          | 2317                  | 1:1000          |
| FoxO1                                                   | Cell Signaling          | 2880                  | 1:1000          |
| FoxO3                                                   | Cell Signaling          | 12829                 | 1:1000          |
| FoxO4                                                   | Abcam                   | 128908                | 1:1000          |
| GAPDH                                                   | Cell Signaling          | 5174                  | 1:1000          |
| IGF1R                                                   | Cell Signaling          | 3027                  | 1:1000          |
| IR                                                      | Santa Cruz              | SC-711                | 1:1000          |
| 19S proteasome subunit                                  | Enzo Life Sciences      | BML-PW8870            | 1:1000          |
| 20S proteasome subunit                                  | Enzo Life Sciences      | BML-PW8155-0025       | 1:1000          |
| LC3A/B (Used for all blots except Supplemental Fig S3C) | Cell Signaling          | 12741                 | 1:1000          |
| LC3A                                                    | Cell Signaling          | 4599                  | 1:1000          |
| LC3B                                                    | Cell Signaling          | 2775                  | 1:1000          |
| p62/SQSTM1                                              | Cell Signaling          | 5114                  | 1:500           |
| p-ULK S555                                              | Cell Signaling          | 5869                  | 1:1000          |
| ULK1                                                    | Cell Signaling          | 8054                  | 1:1000          |
| PARP                                                    | Cell Signaling          | 9542                  | 1:500           |
| p-Akt S473                                              | Cell Signaling          | 9271                  | 1:1000          |
| Akt                                                     | Cell Signaling          | 4685                  | 1:1000          |

# Full Uncut Gels

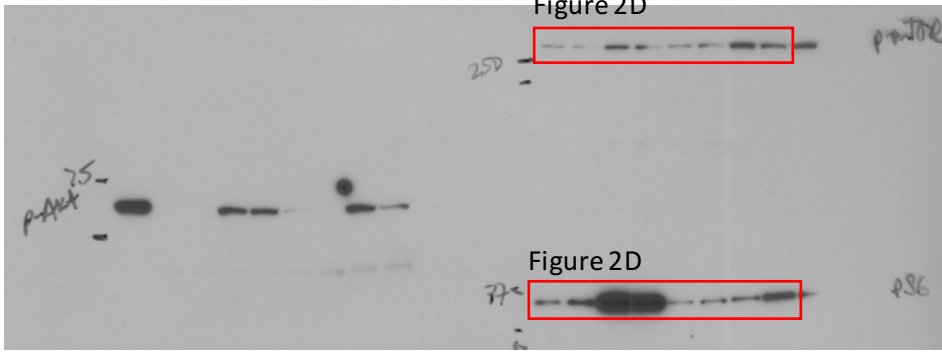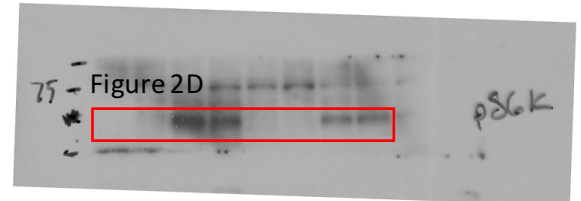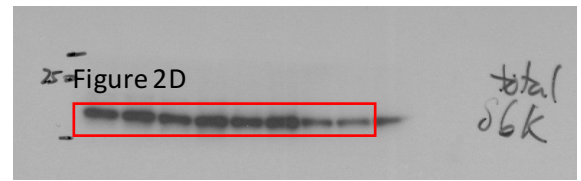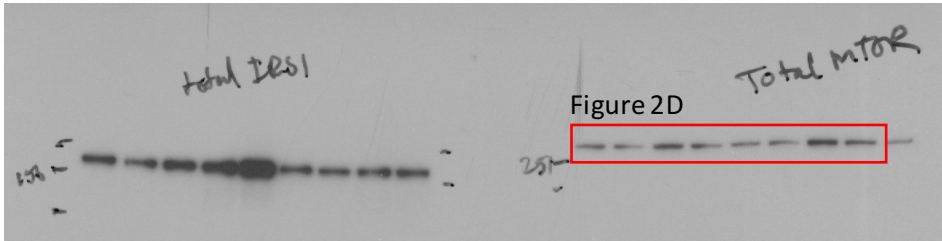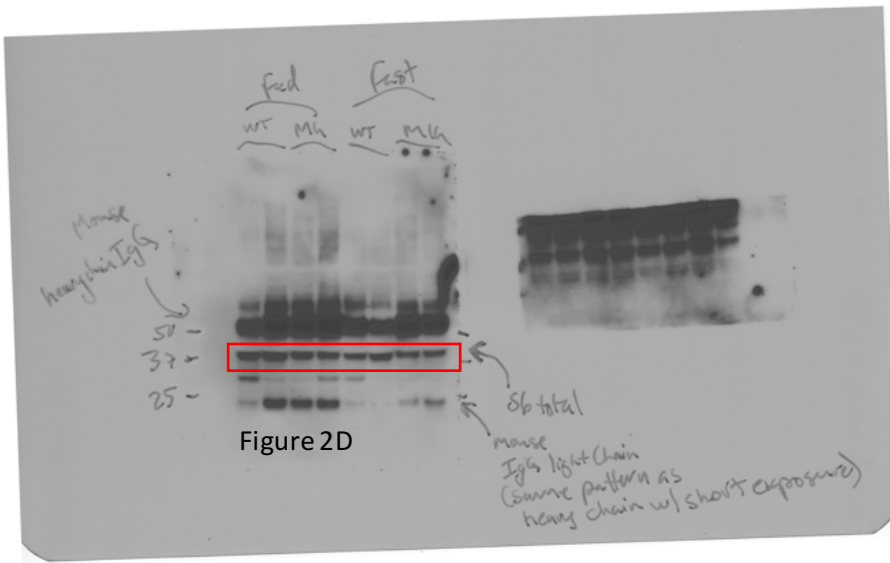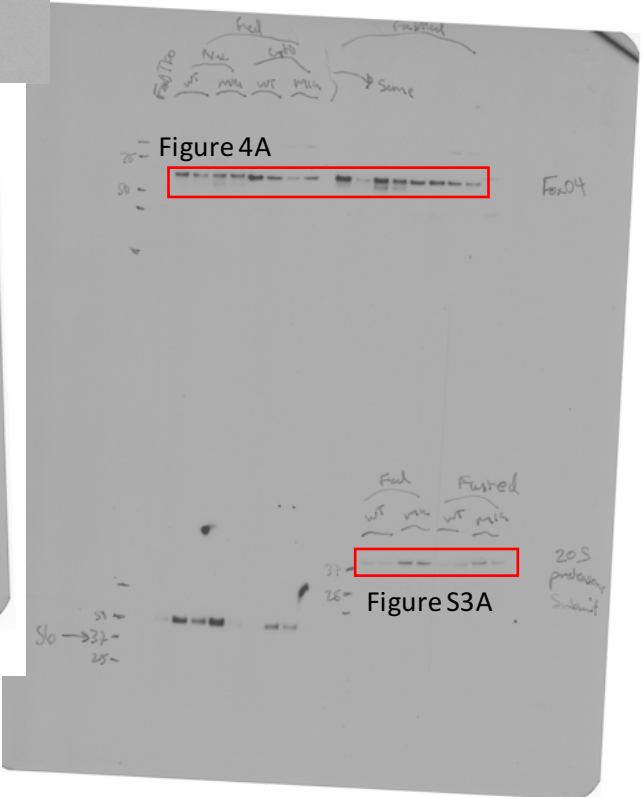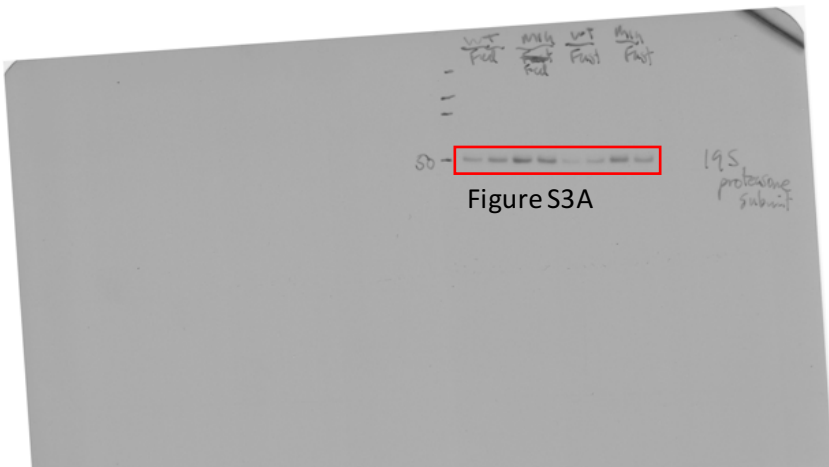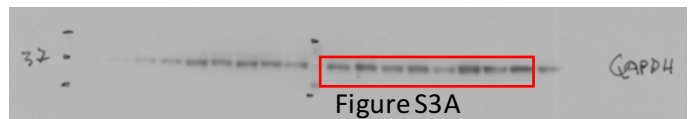

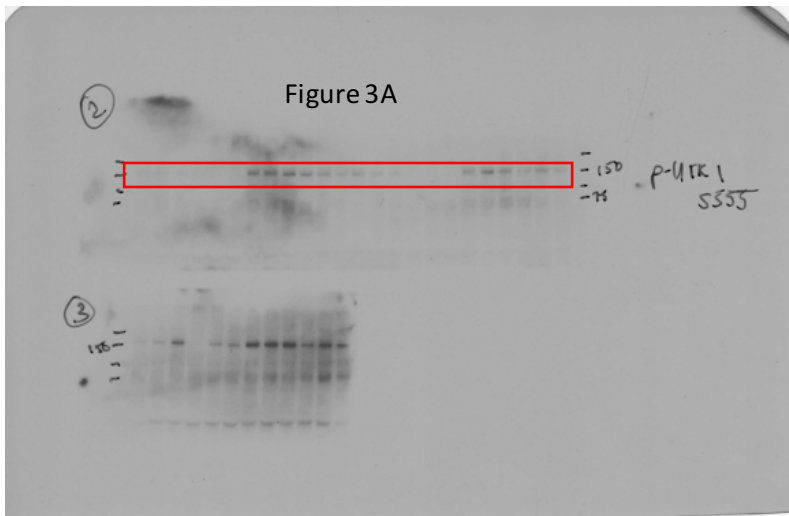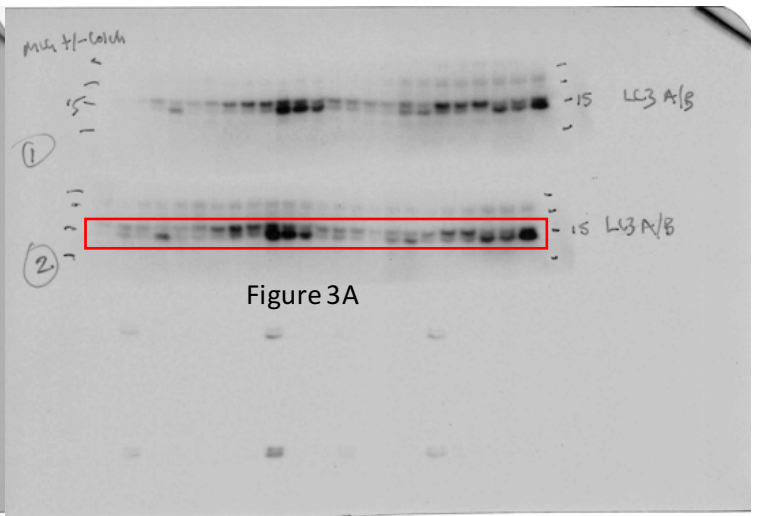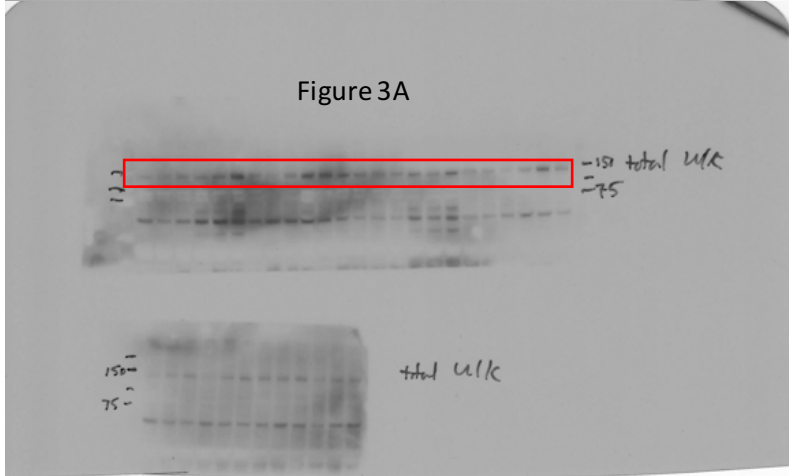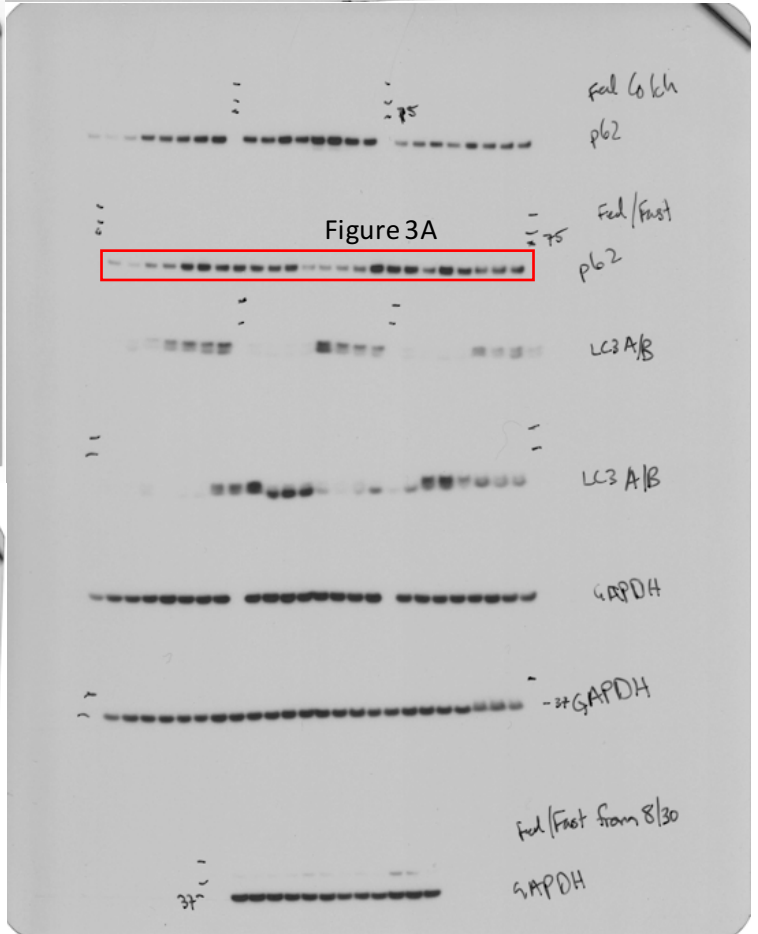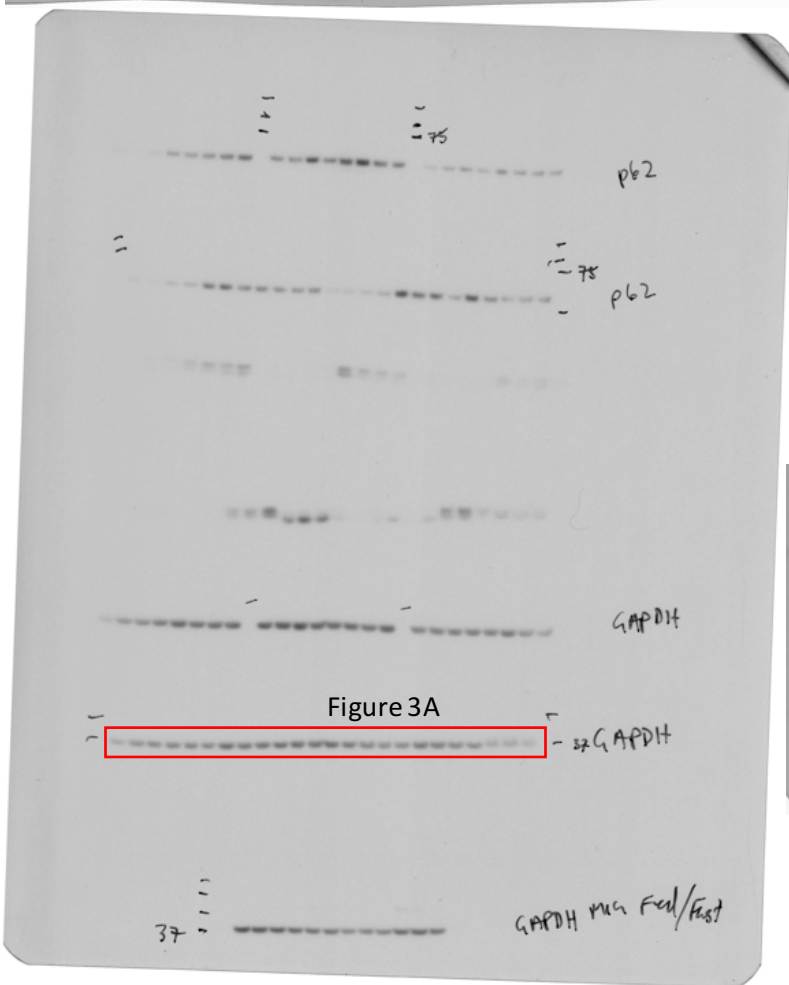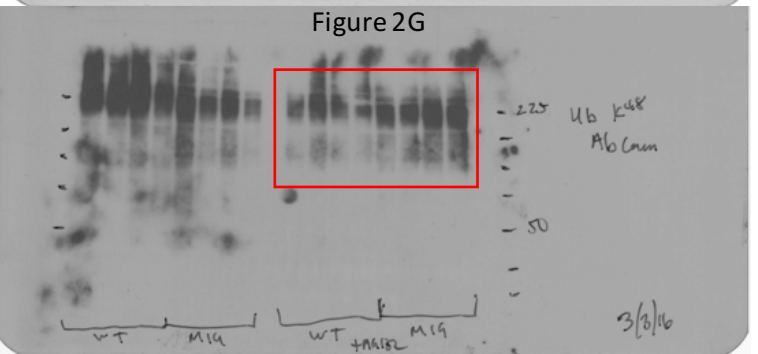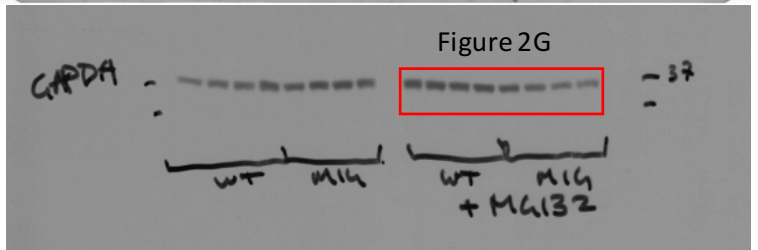



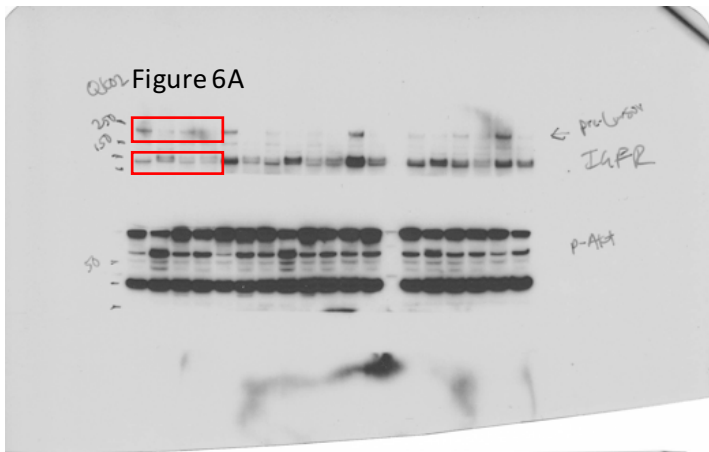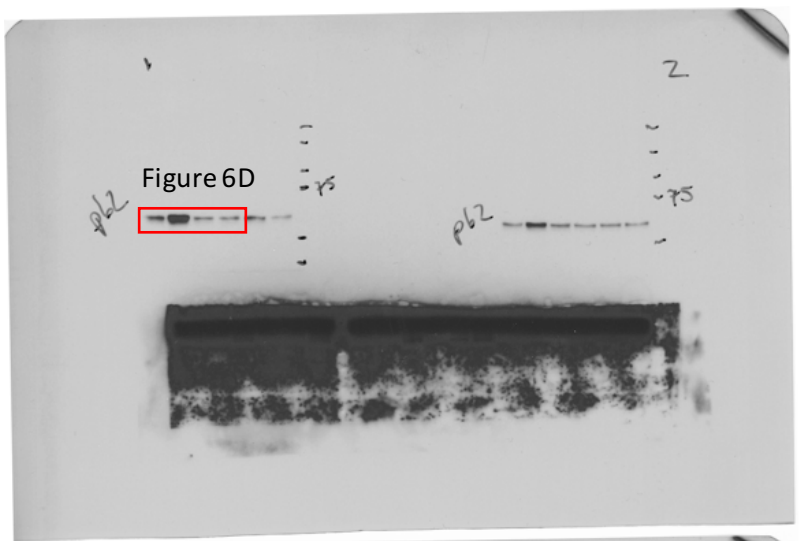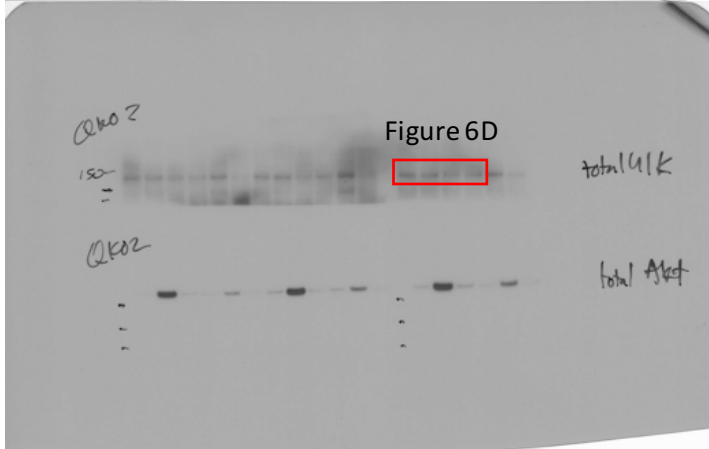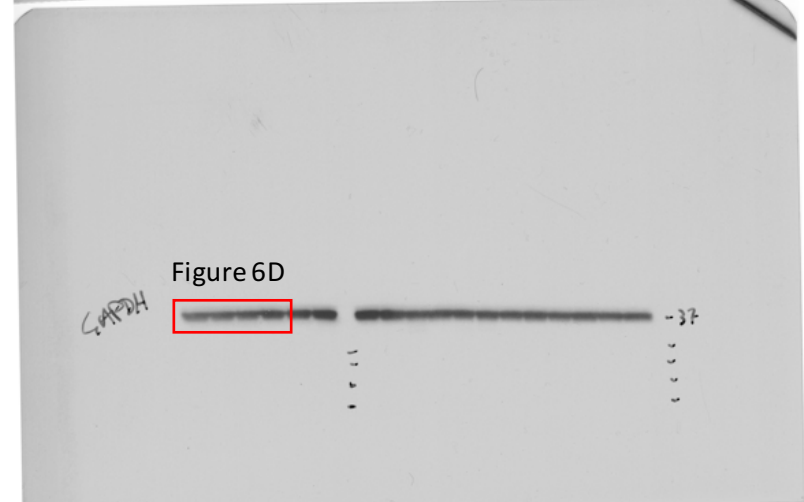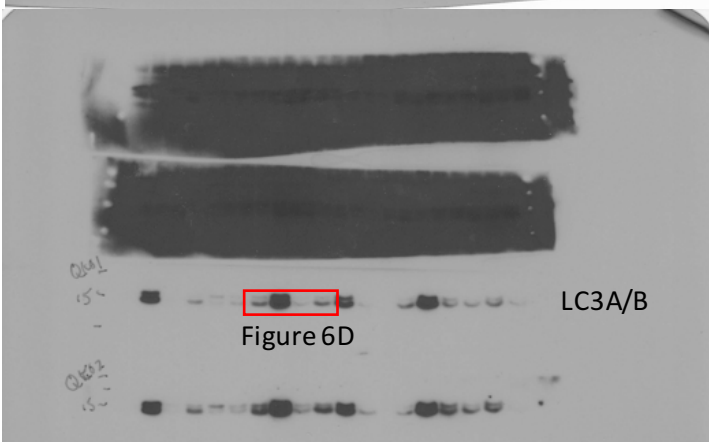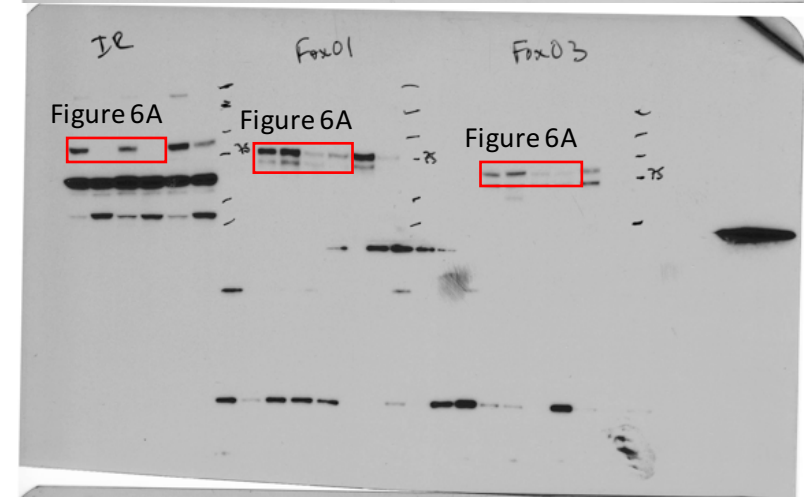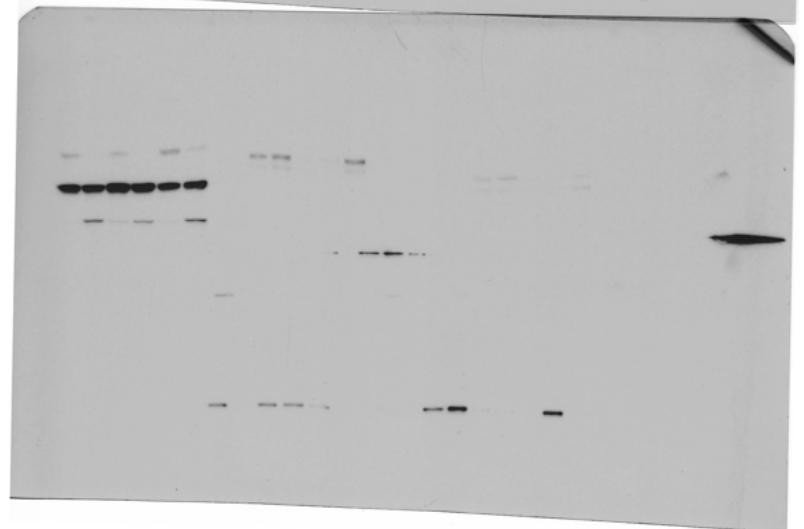

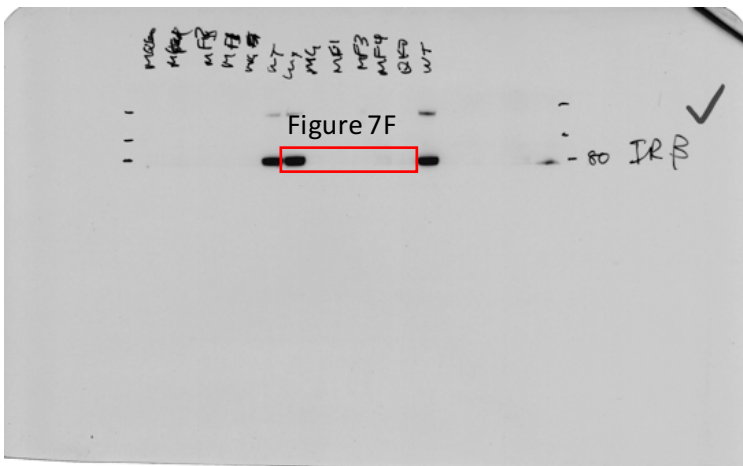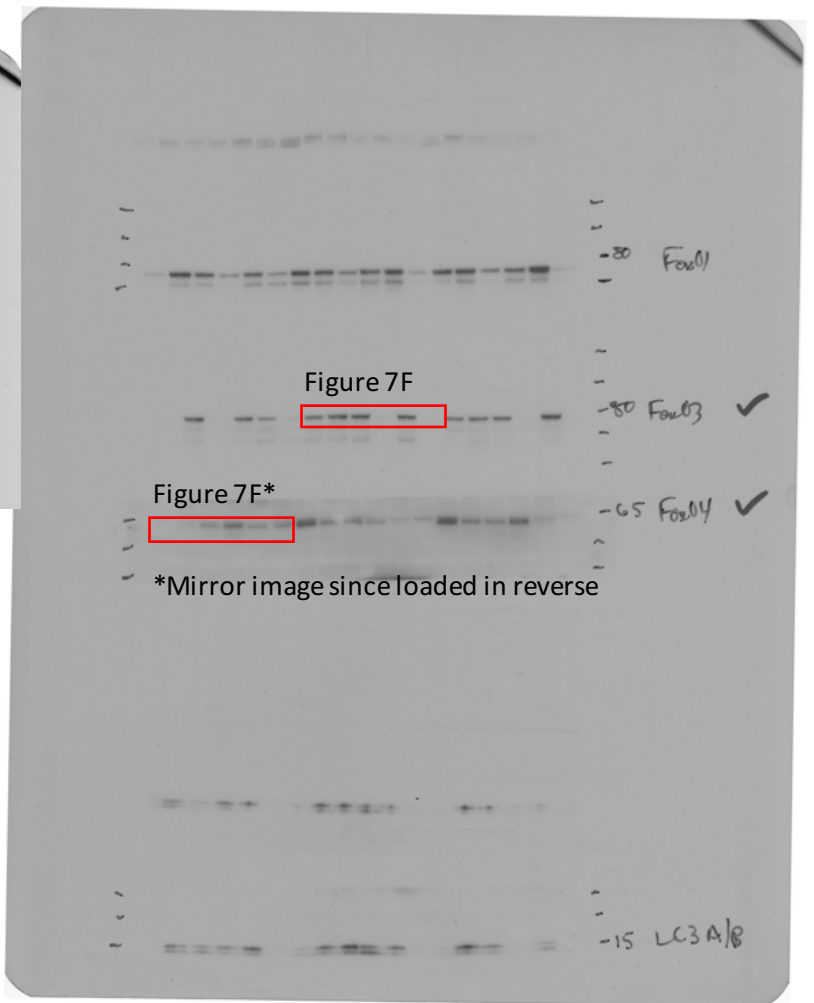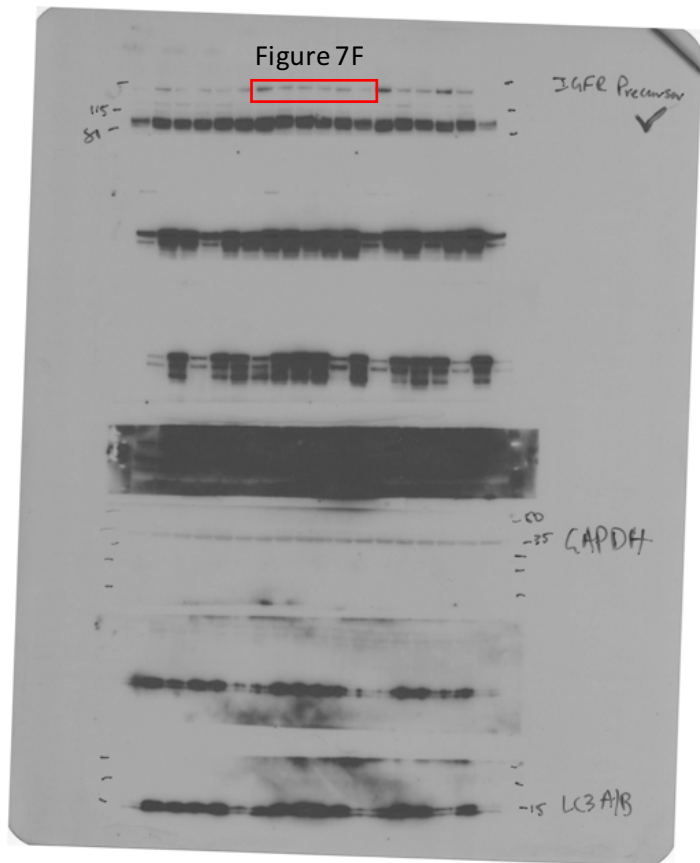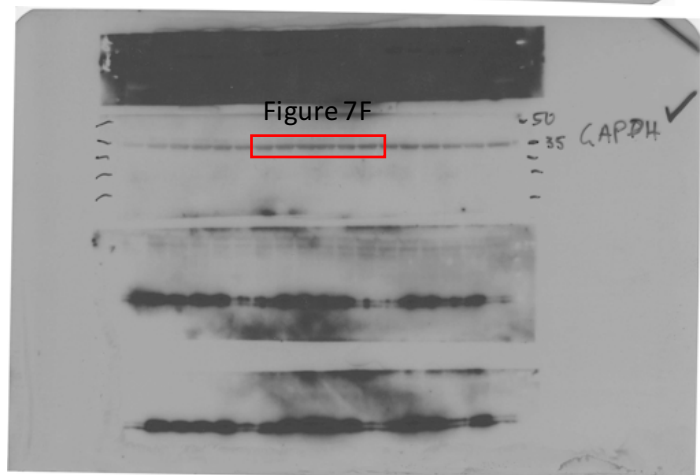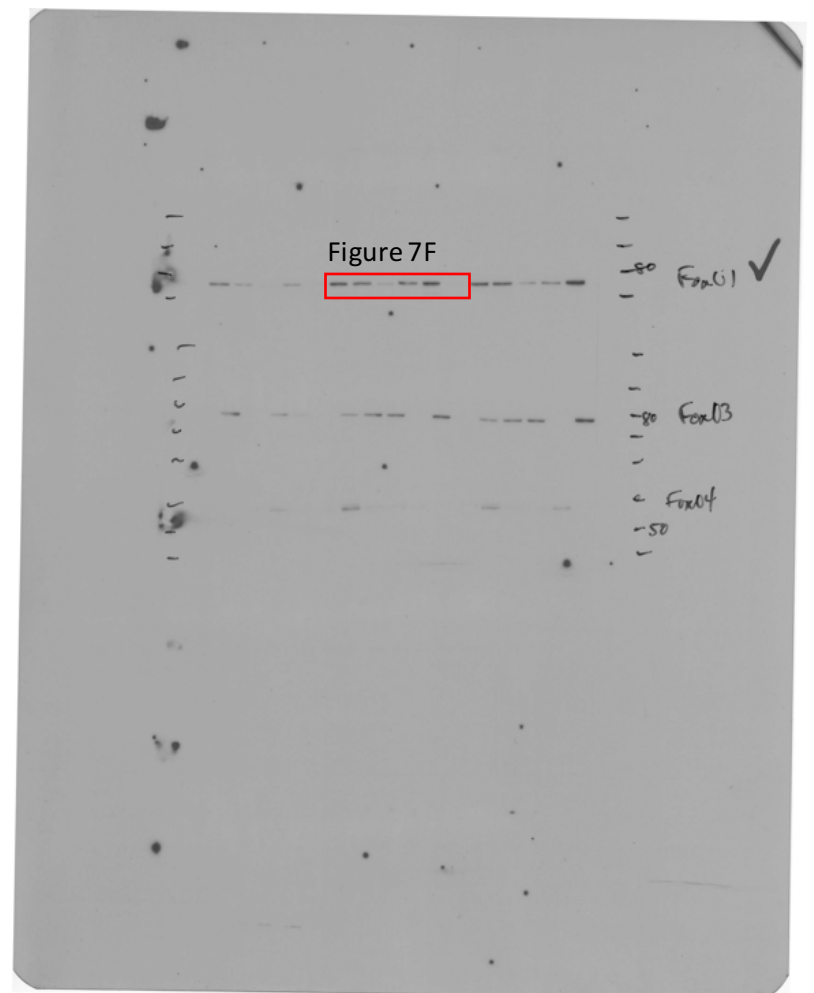



Full Uncut Gels from Supplemental Figures

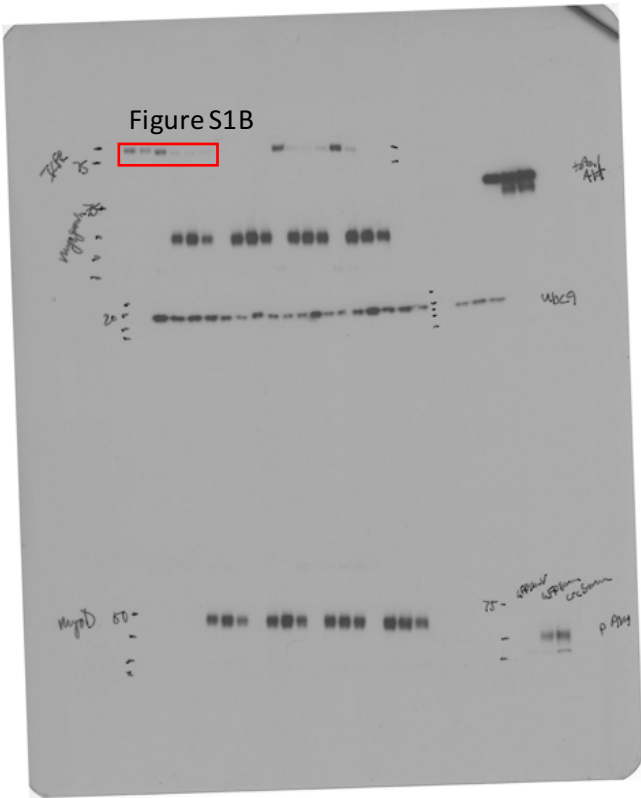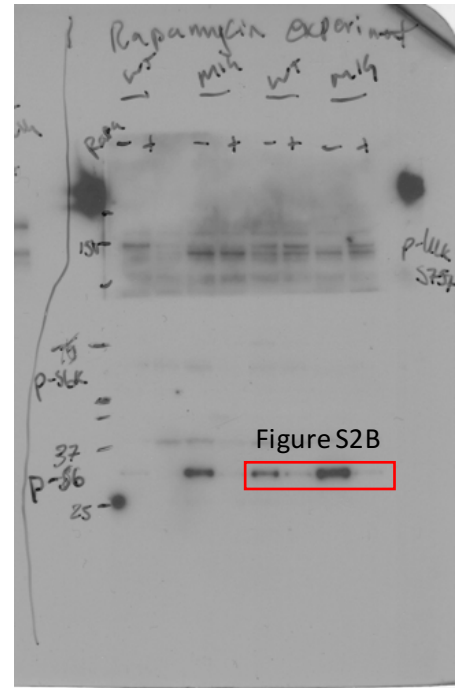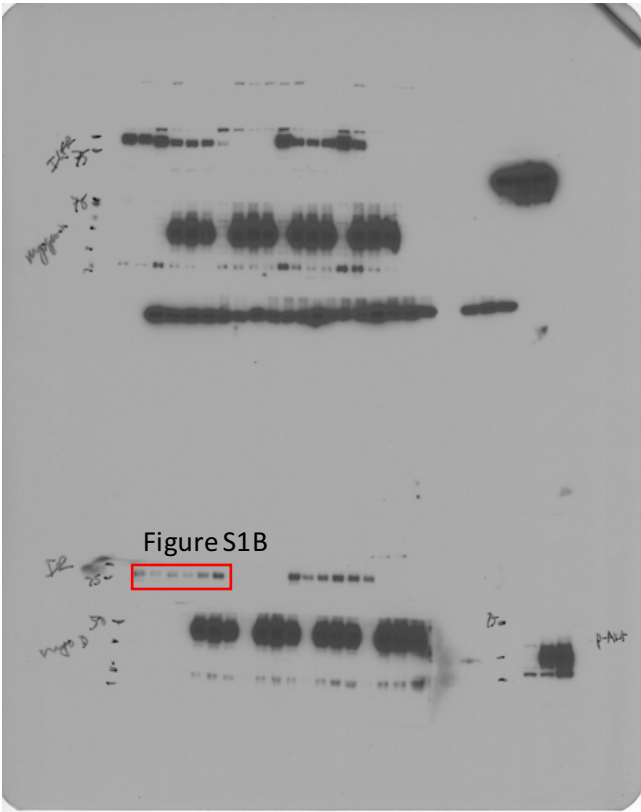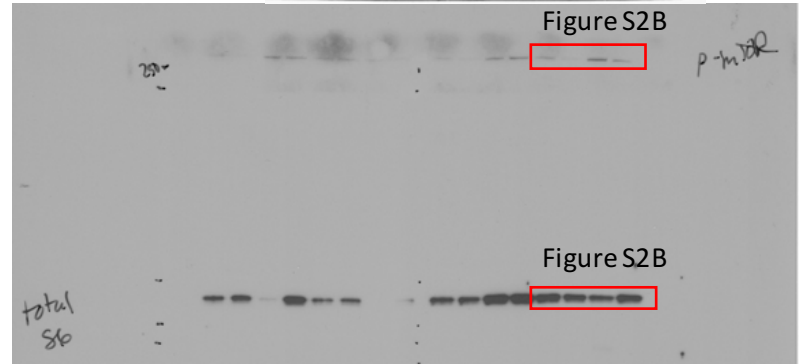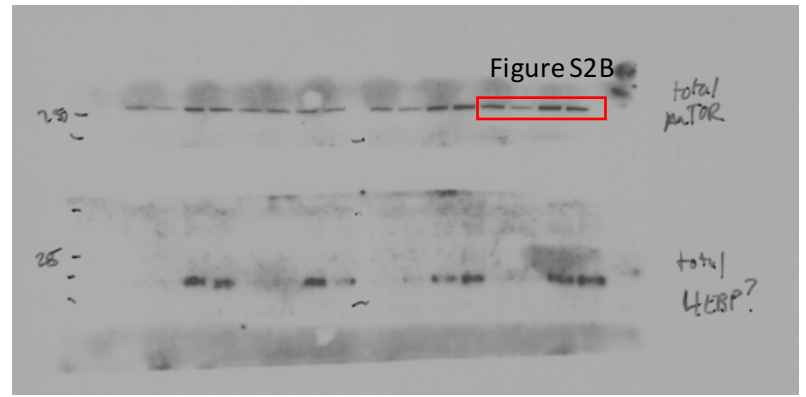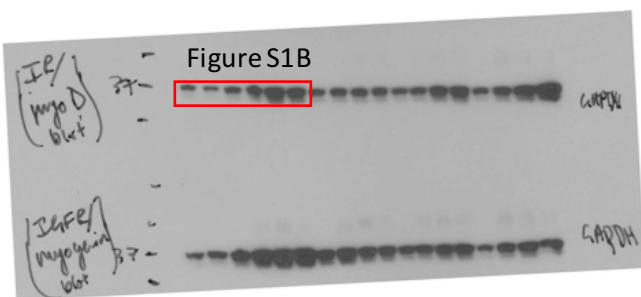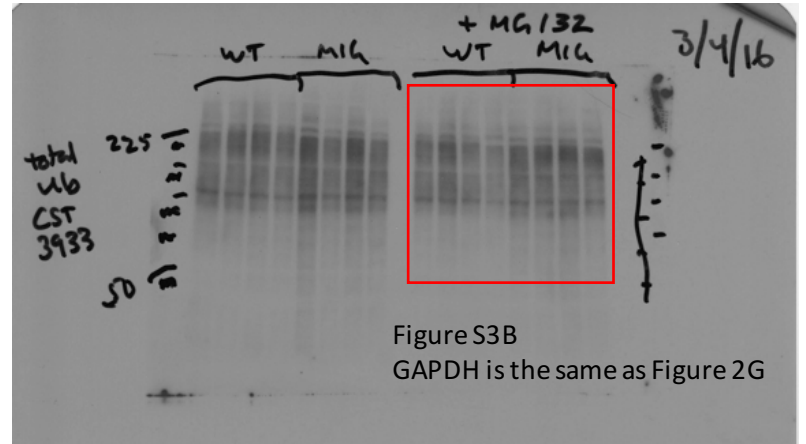

Figure S3B  
GAPDH is the same as Figure 2G



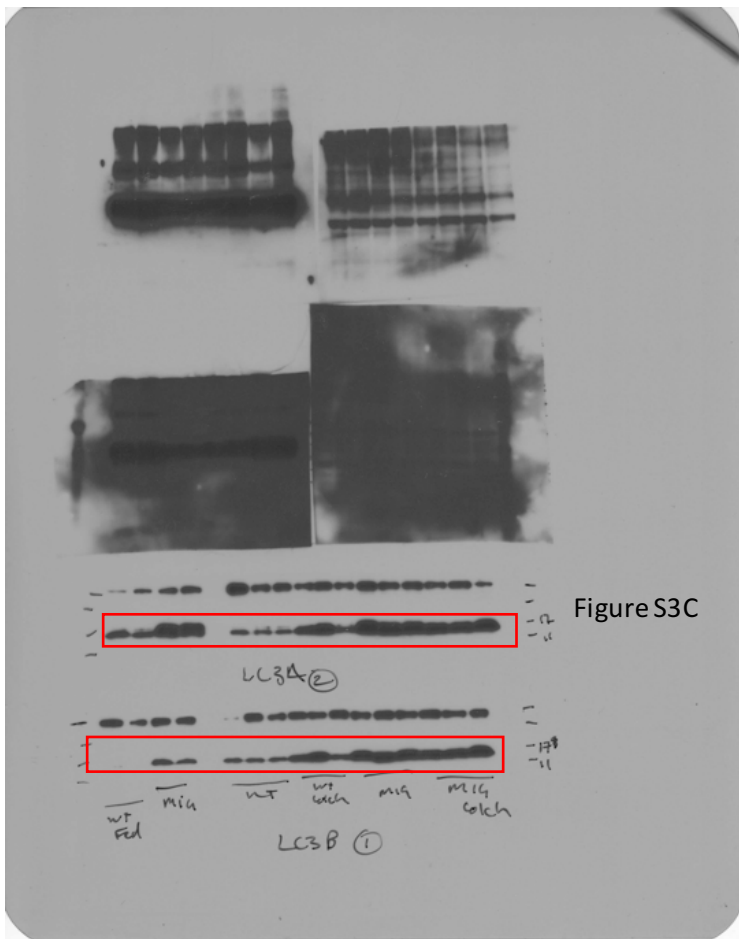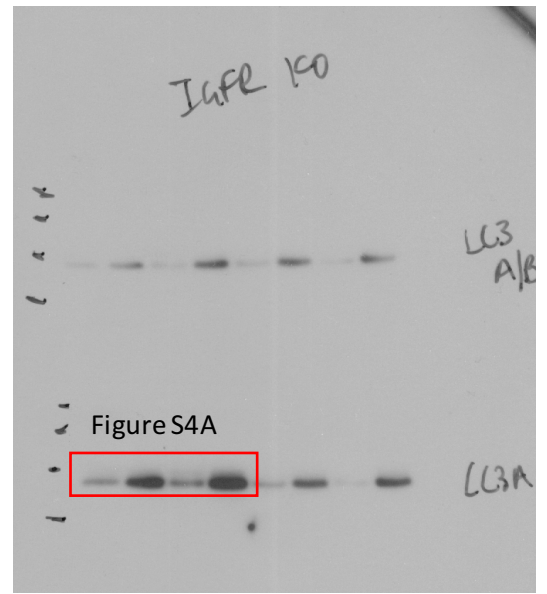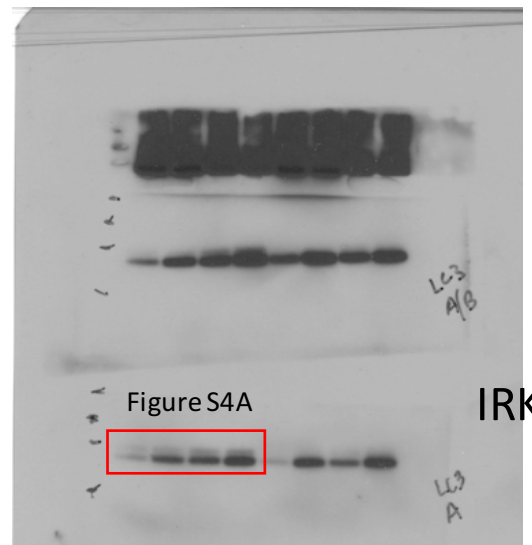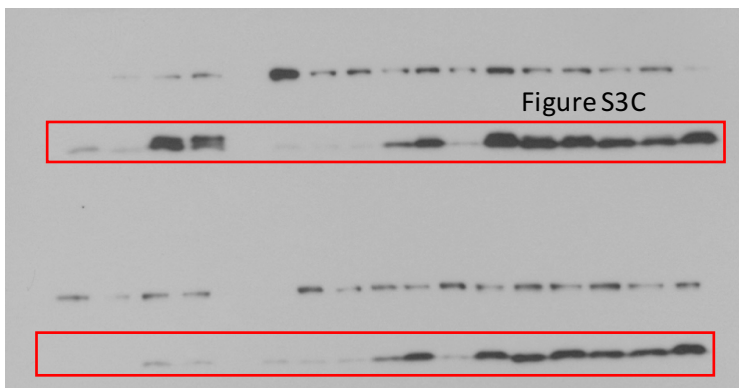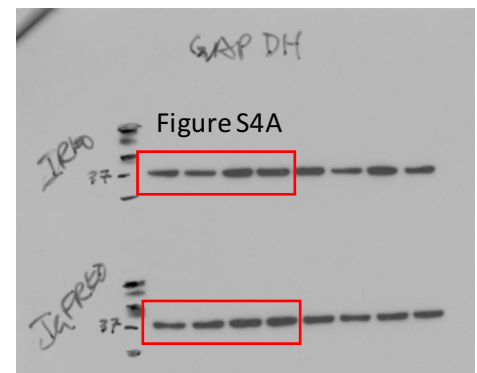

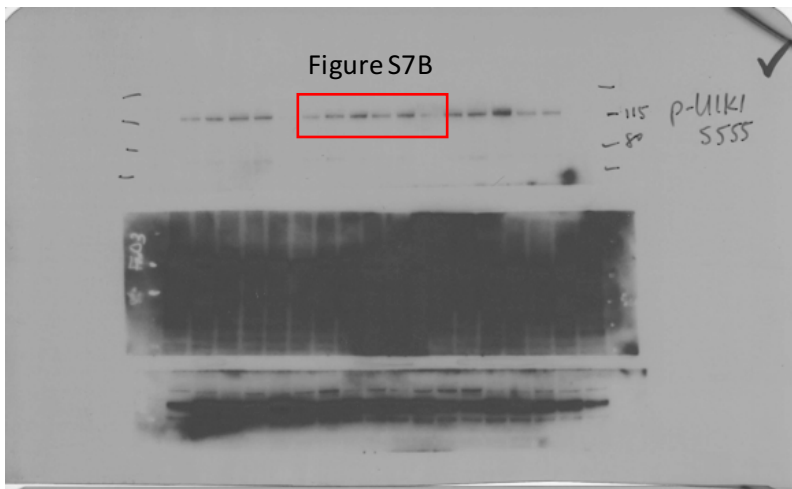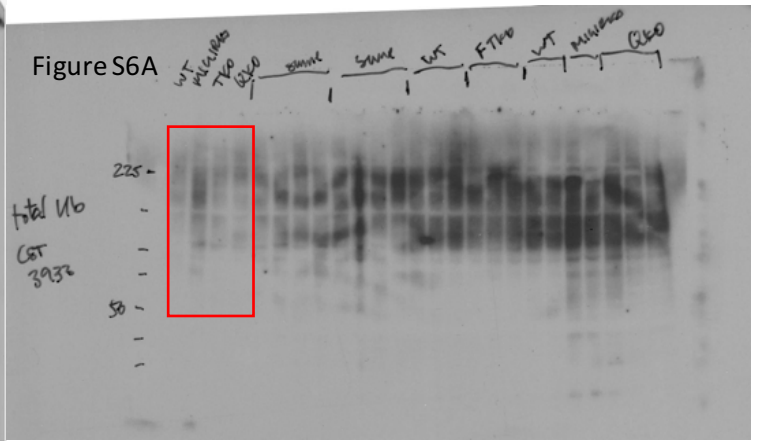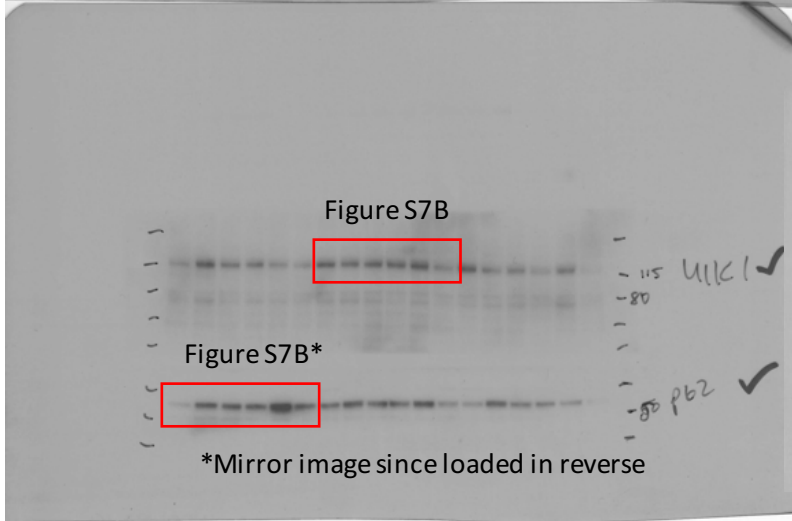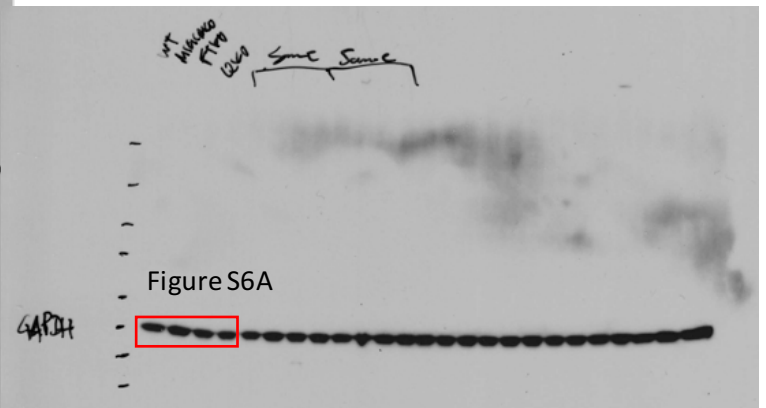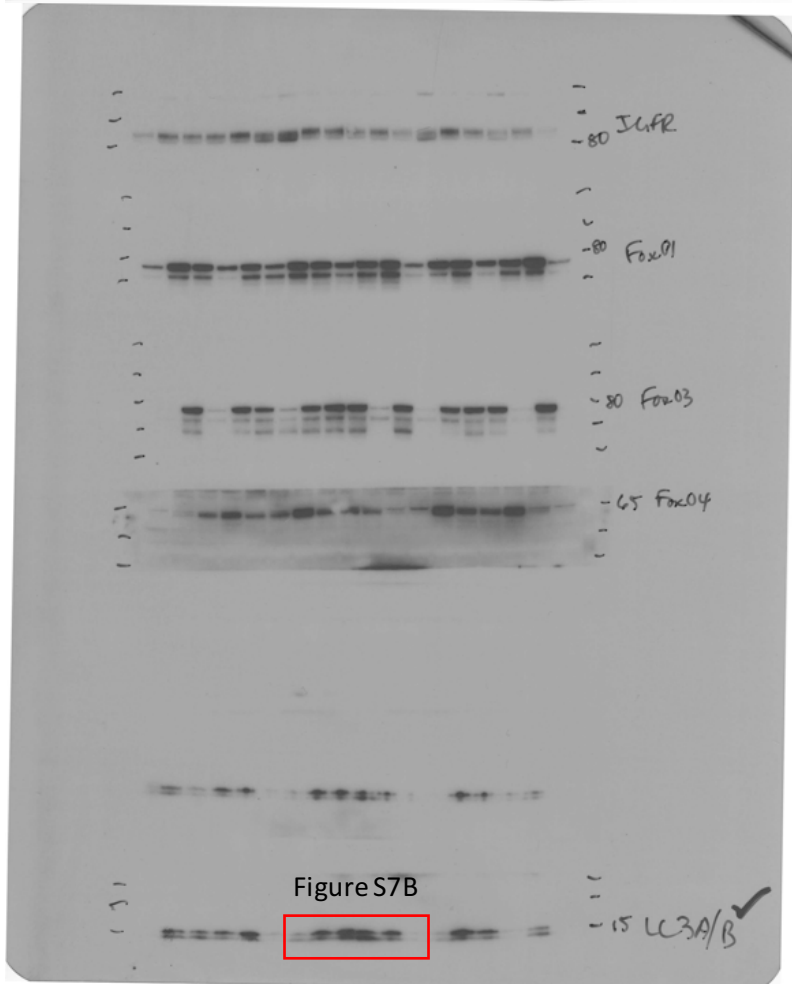

GAPDH for Figure S6A is the same as Figure 7F above since they were run on the same gels.
